# Supplementary material for: Design, synthesis, biological evaluation, and SAR studies of novel cyclopentaquinoline derivatives as DNA intercalators, topoisomerase II inhibitors, and apoptotic inducers
Source: Royal Society of Chemistry journal article supplement (doi:10.1039/d2nj01646j), 2022-01-01

**Design, Synthesis, Biological Evaluation, and SAR Studies of Novel Cyclopentaquinoline Derivatives as DNA Intercalators, Topoisomerase II Inhibitors, and Apoptotic Inducers**

Mohamed M. Hammoud<sup>a,b,\*</sup>, Alaa S. Nageeb<sup>b</sup>, M. A. Morsi<sup>b</sup>, Esam A. Gomaa<sup>b</sup>, Ayman Abo Elmaaty<sup>c</sup>,  
and Ahmed A. Al-Karmalawy<sup>d,\*</sup>

<sup>a</sup> Department of Chemistry, College of Science and Humanities in Al-Kharj, Prince Sattam Bin Abdulaziz University, Al-Kharj 11942, Saudi Arabia.

<sup>b</sup> Department of Chemistry, Faculty of Science, Mansoura University, Mansoura 35516, Egypt.

<sup>c</sup> Department of Medicinal Chemistry, Faculty of Pharmacy, Port Said University, Port Said 42526, Egypt.

<sup>d</sup> Department of Pharmaceutical Medicinal Chemistry, Faculty of Pharmacy, Horus University-Egypt, New Damietta 34518, Egypt.

\* Corresponding authors:

**Ahmed A. Al-Karmalawy:** Email: [akarmalawy@horus.edu.eg](mailto:akarmalawy@horus.edu.eg)

**ORCID:** [0000-0002-8173-6073](https://orcid.org/0000-0002-8173-6073)

**Mohamed M. Hammoud:** Email: [elmhammouda@mans.edu.eg](mailto:elmhammouda@mans.edu.eg)

**Figure SI 1.** 2D overlay diagram showing the superimposition of the native co-crystallized EVP, and the redocked co-crystallized one at human topoisomerase II-DNA complex target protein with **PDB:** 3QX3 with RMSD value 1.42 Å after the re-docking process for MOE program validation.

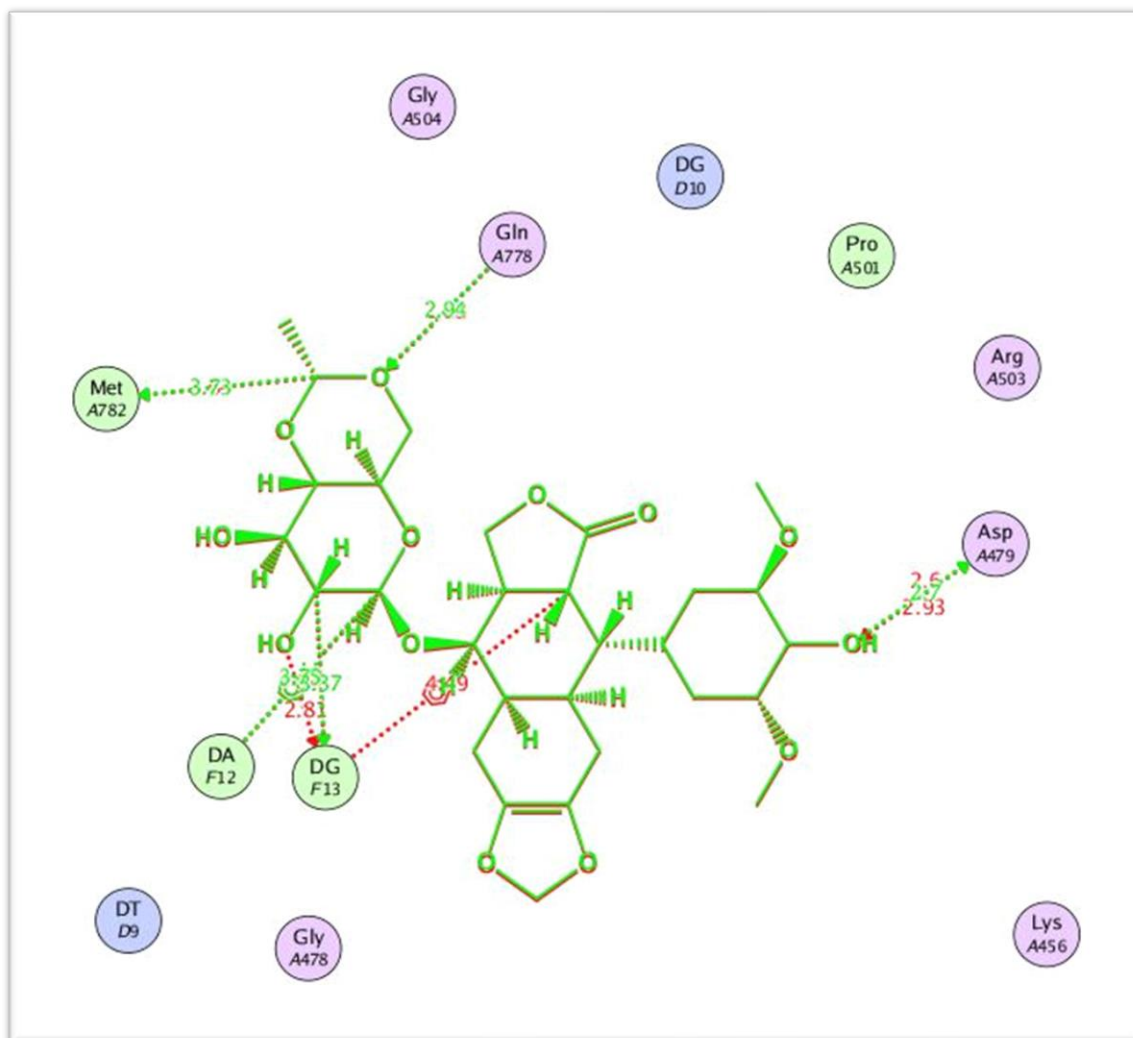

**Table SI 1.** Cytotoxic activity of some compounds against Liver, Breast, and Colon cancer cell lines.

| <b>Comp.</b>       | <b>In vitro Cytotoxicity IC<sub>50</sub> (μM)•</b> |              |                |                |               |
|--------------------|----------------------------------------------------|--------------|----------------|----------------|---------------|
|                    | <b>HePG-2</b>                                      | <b>MCF-7</b> | <b>HCT-116</b> | <b>MDA-231</b> | <b>Caco-2</b> |
| <b>5</b>           | 10.45±0.8                                          | 36.33±2.3    | 22.49±1.8      | 17.09±1.4      | 57.39±3.2     |
| <b>6a</b>          | 64.28±2.8                                          | 56.48±3.1    | 49.12±2.7      | 62.27±3.2      | 74.28±3.8     |
| <b>6b</b>          | 28.43±1.9                                          | 23.87±1.8    | 30.04±2.2      | 34.62±2.4      | 45.49±2.9     |
| <b>6c</b>          | 19.57±1.4                                          | 15.92±1.2    | 13.55±1.1      | 26.86±2.0      | 31.02±2.5     |
| <b>6d</b>          | 7.06±0.4                                           | 11.61±0.8    | 6.28±0.3       | 8.32±0.6       | 18.76±1.4     |
| <b>6e</b>          | 46.60±2.3                                          | 41.52±2.5    | 37.25±2.4      | 50.39±2.9      | 67.01±3.5     |
| <b>6f</b>          | 2.31±0.1                                           | 6.83±0.4     | 3.67±0.2       | 4.78±0.3       | 9.83±0.7      |
| <b>6g</b>          | 72.14±3.2                                          | 82.36±3.9    | 68.43±3.1      | 75.41±3.5      | 92.53±4.2     |
| <b>Doxorubicin</b> | 4.50±0.2                                           | 4.17±0.2     | 5.23±0.3       | 3.18±0.1       | 12.49±1.1     |

**Table SI 2.** Binding scores, RMSD values, and amino acid/nucleotides interactions of the synthesized compounds (**6a-g**) into DNA–topo II complex along with doxorubicin and the co-crystallized ligand (EVP) as two reference standards.

| <b>Compound</b>    | <b>Score<sup>a</sup></b> | <b>RMSD_refine<sup>b</sup></b> | <b>Interactions</b>                                                                                  | <b>Distance Å</b>                            |
|--------------------|--------------------------|--------------------------------|------------------------------------------------------------------------------------------------------|----------------------------------------------|
| <b>6a</b>          | -6.22                    | 0.65                           | DT9/H-donor                                                                                          | 3.28                                         |
| <b>6b</b>          | -6.49                    | 1.94                           | ASP479/H-donor<br>DA12/H-acceptor<br>DG13/pi-pi<br>DG13/pi-pi                                        | 3.34<br>3.44<br>3.54<br>3.56                 |
| <b>6c</b>          | -5.81                    | 1.12                           | DG13/H-donor<br>DG13/H-pi                                                                            | 3.20<br>3.94                                 |
| <b>6d</b>          | -5.75                    | 0.73                           | ARG503/H-donor<br>GLN778/H-acceptor<br>DG13/H-pi<br>DG13/pi-pi                                       | 3.17<br>3.46<br>3.75<br>3.87                 |
| <b>6e</b>          | -6.99                    | 1.75                           | DA12/H-pi<br>DT9/H-pi<br>DG13/pi-pi                                                                  | 3.66<br>3.72<br>3.68                         |
| <b>6f</b>          | -6.62                    | 0.93                           | ASP479/H-donor<br>ARG503/H-acceptor<br>ARG503/pi-H<br>DG13/pi-pi                                     | 3.02<br>3.20<br>4.10<br>3.85                 |
| <b>6g</b>          | -6.96                    | 1.54                           | DT9/H-pi<br>DT9/pi-H<br>DG13/pi-pi<br>DG/13/pi-pi                                                    | 4.05<br>3.69<br>3.77<br>3.54                 |
| <b>Doxorubicin</b> | -8.92                    | 1.35                           | ASP479/H-donor<br>DG10/H-donor<br>DA12/H-donor<br>ASP479/H-acceptor<br>SER480/H-acceptor<br>DT9/pi-H | 2.83<br>3.20<br>3.08<br>3.02<br>3.38<br>3.48 |
| <b>EVP</b>         | -10.52                   | 1.41                           | ASP479/H-donor<br>MET782/H-donor<br>DG13/H-donor<br>GLN778/H-acceptor<br>DA12/H-pi                   | 2.70<br>3.73<br>3.37<br>2.94<br>3.75         |

**Table SI 3.** 2D pictures, 3D interactions and 3D protein positioning pictures representing the binding interactions of the investigated compounds (**6a-6g**) into human topoisomerase II-DNA complex target protein with the redocked co-crystallized ligand EVP and doxorubicin as reference controls.

| Compound | 2D picture | 3D interactions | 3D protein position |
|----------|------------|-----------------|---------------------|
| 6a       |            |                 |                     |
| 6b       |            |                 |                     |

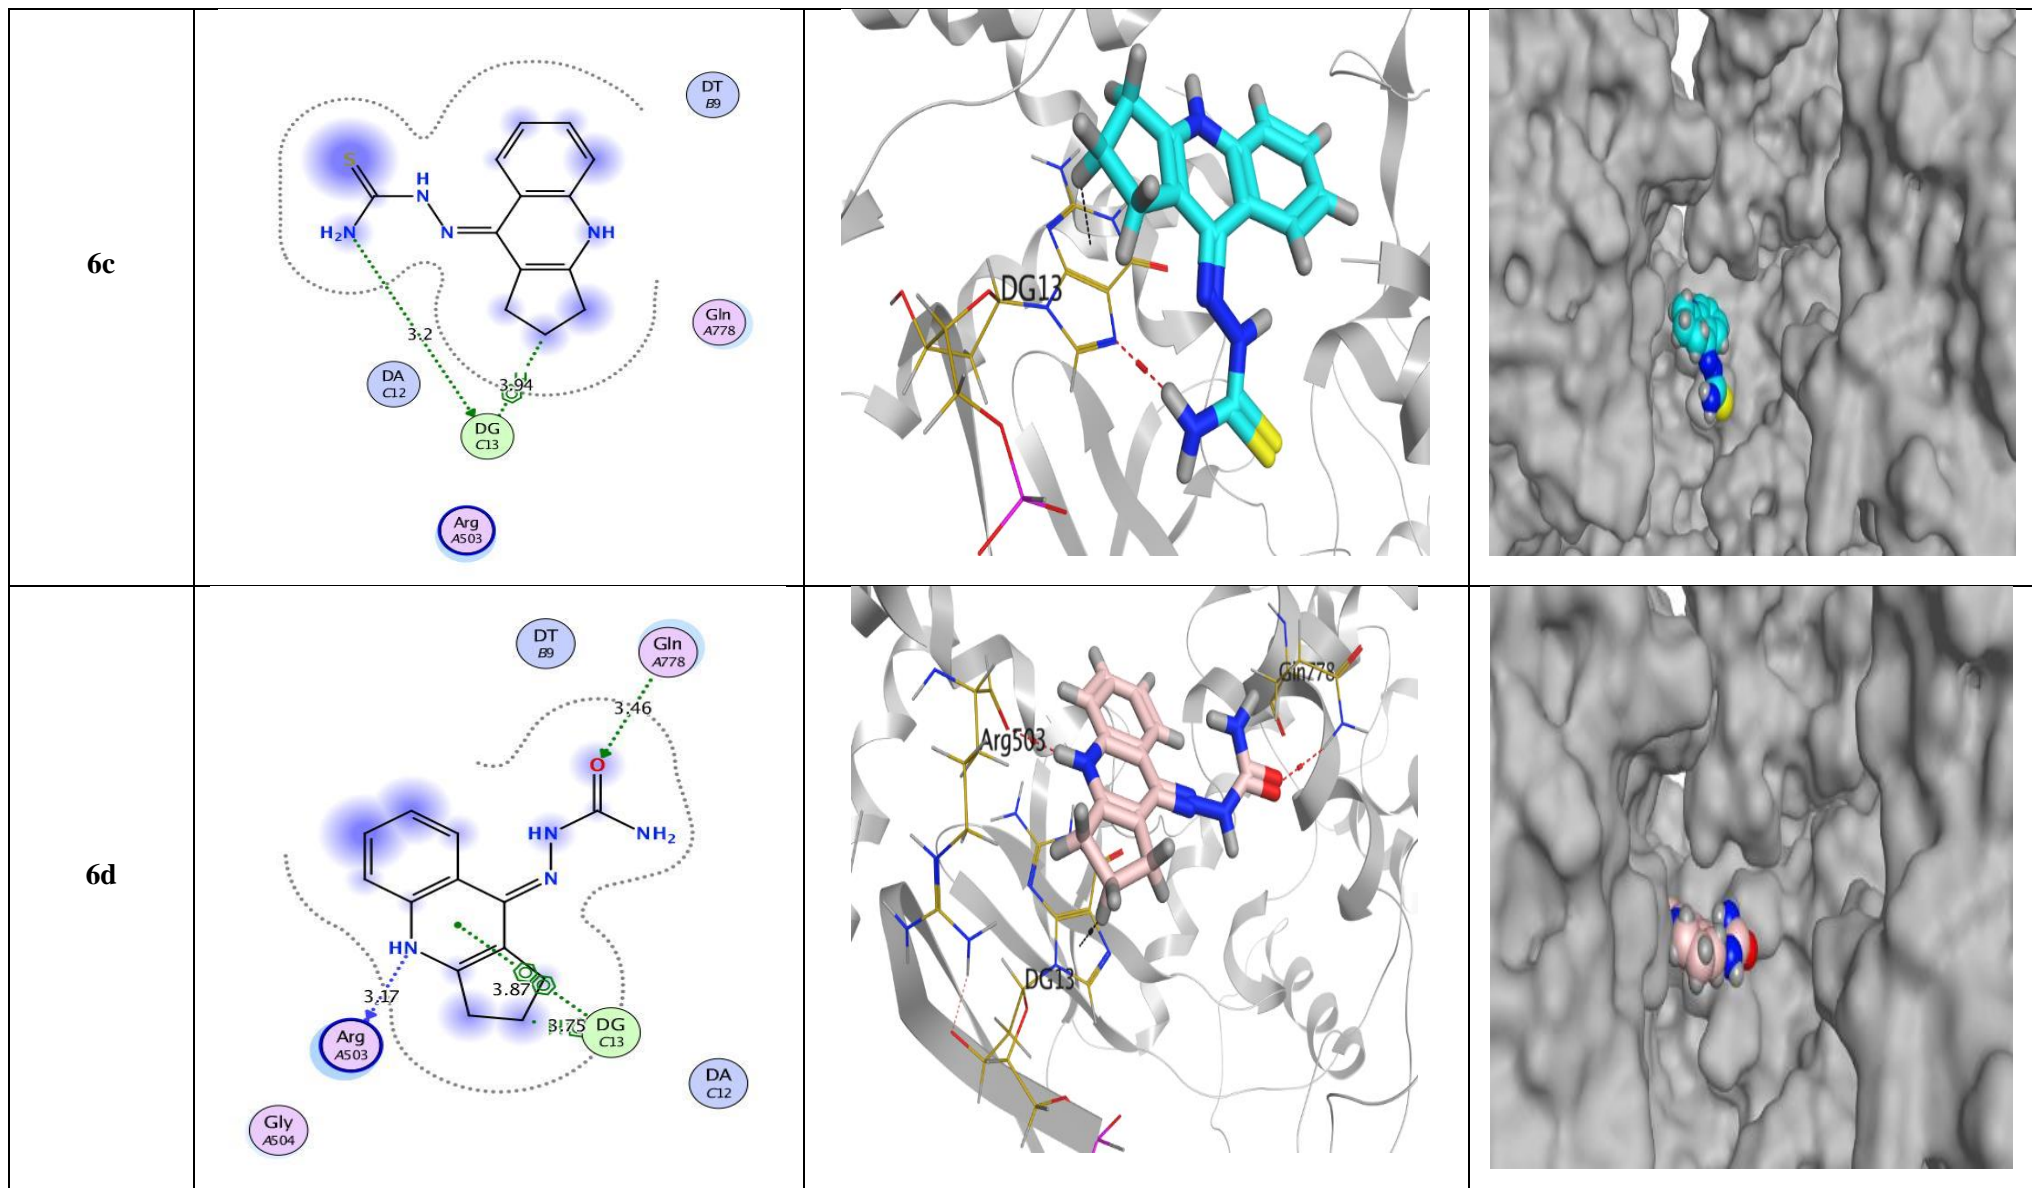

6e

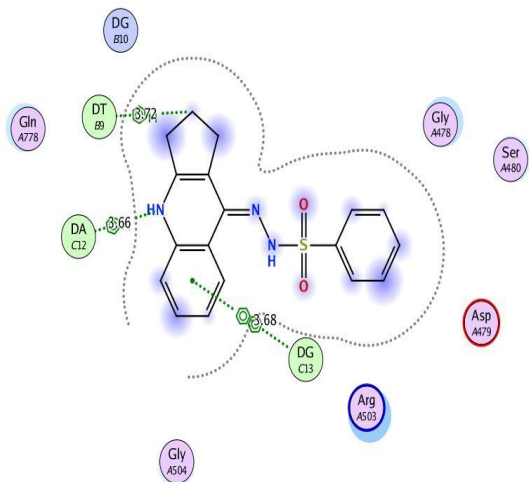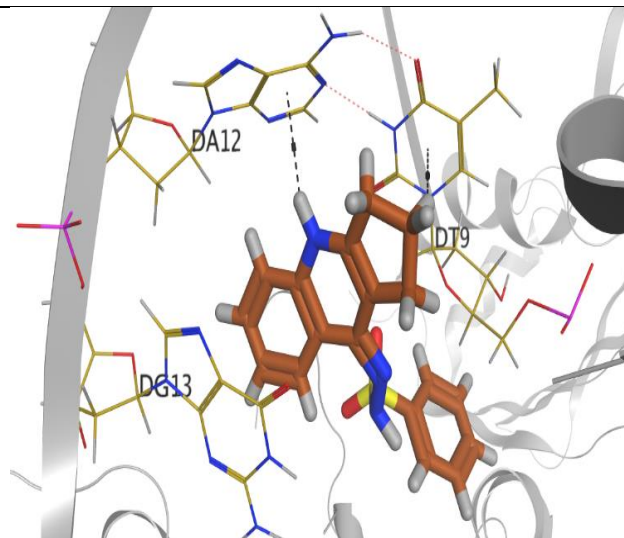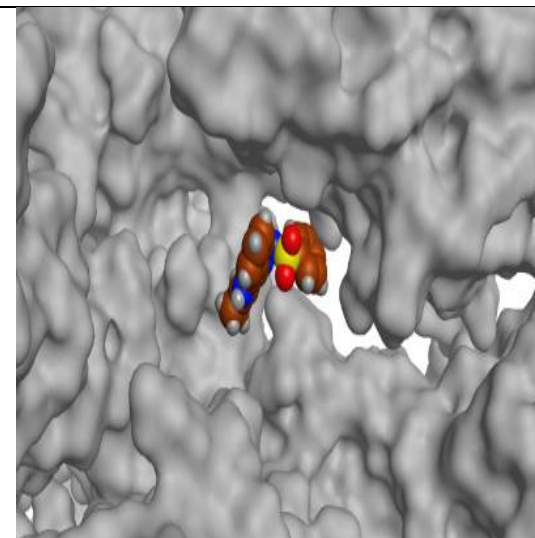

6f

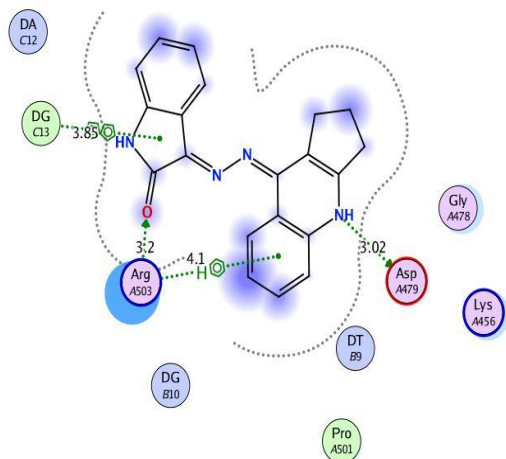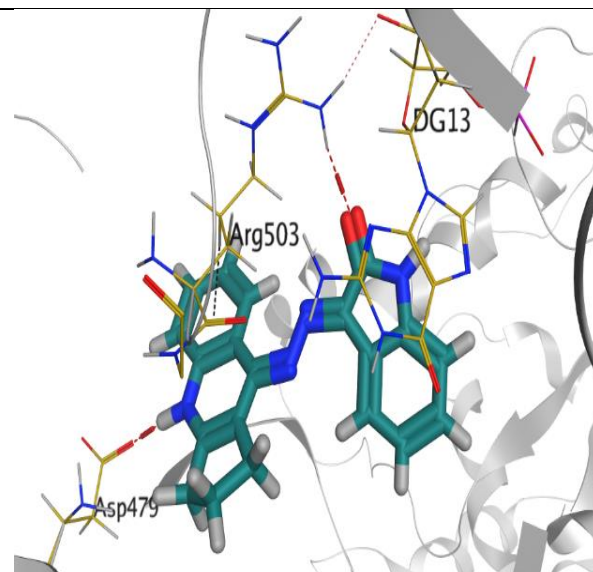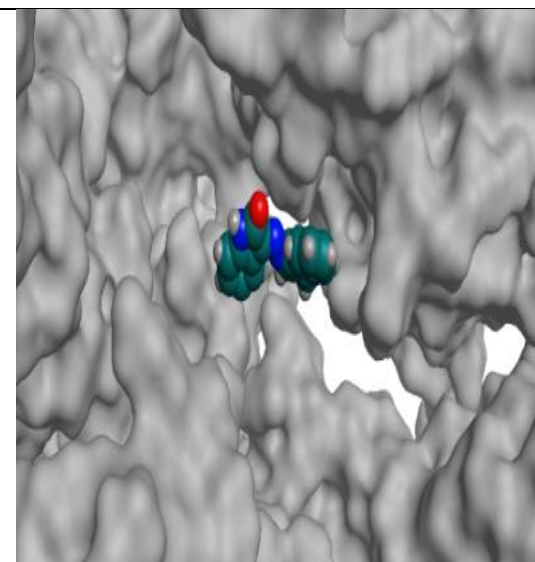

6g

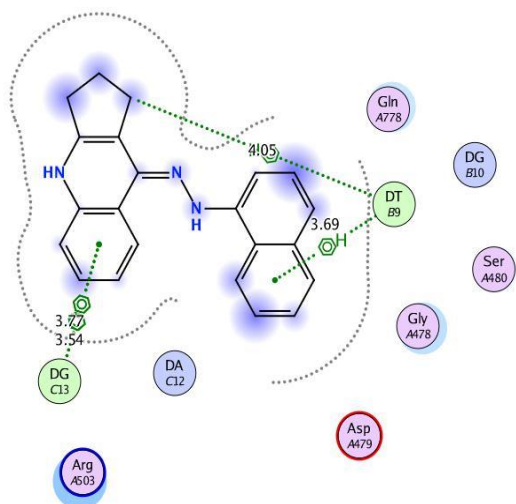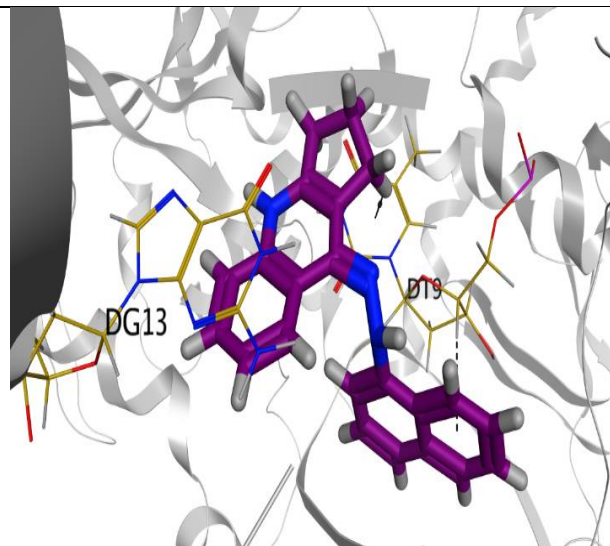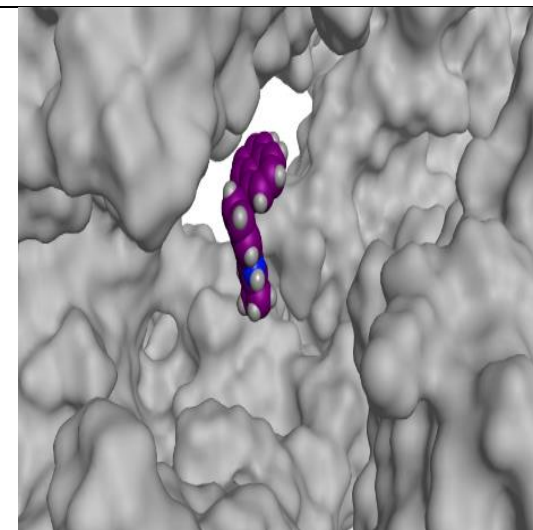

Doxorubicin

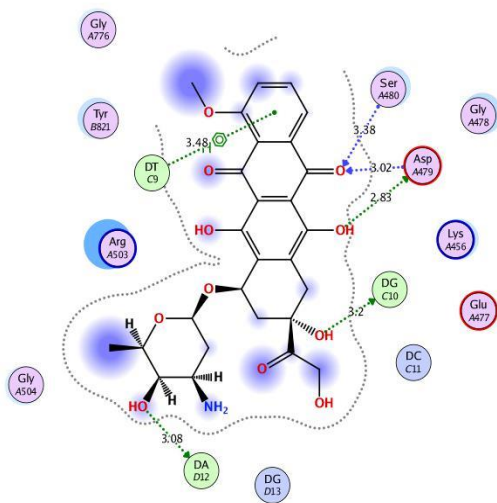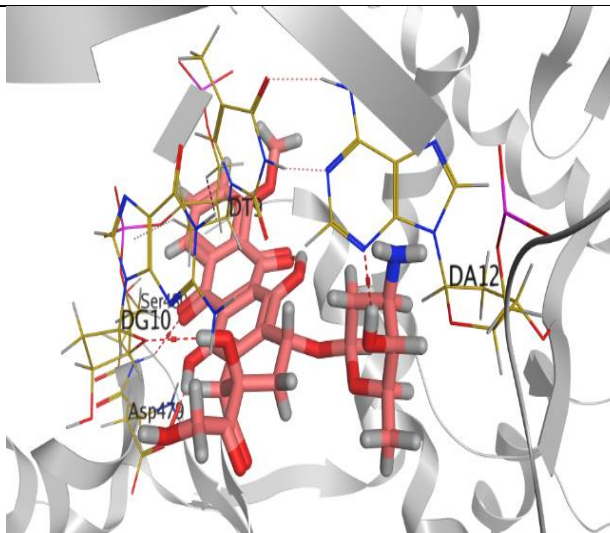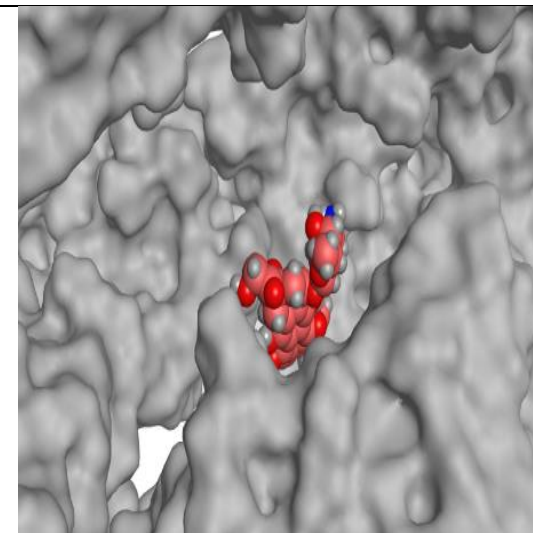



Re-docked  
EVP

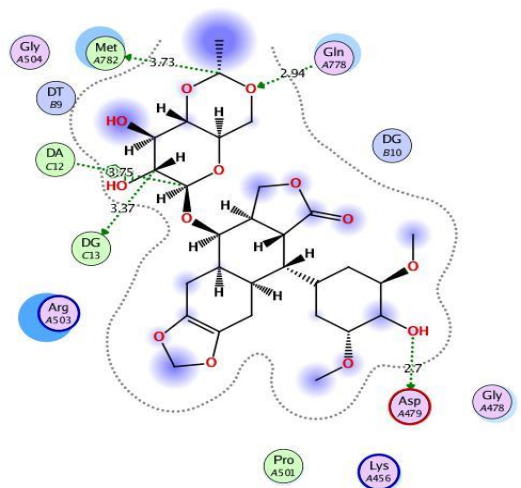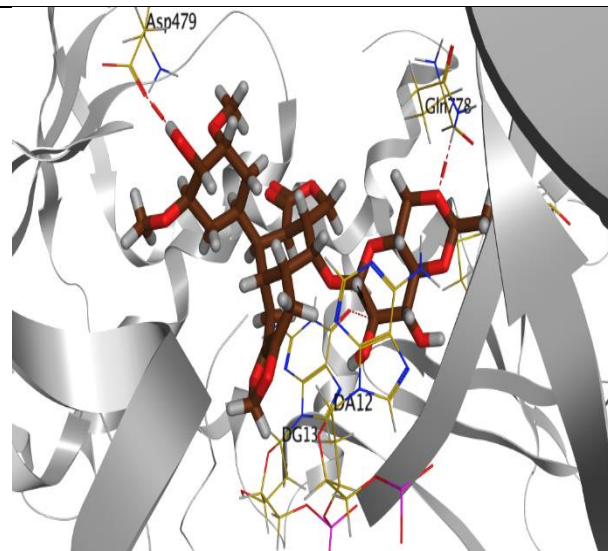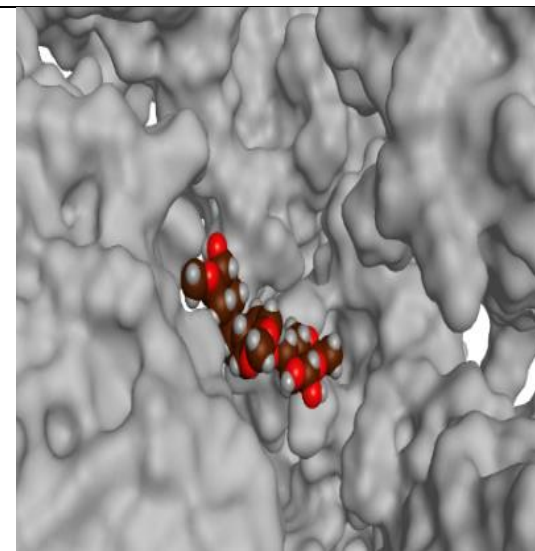

SI 1. Spectral data of compounds (6a-g), (IR, <sup>1</sup>HNMR, <sup>13</sup>CNMR, DEPT, and Mass spectroscopy).

(Z)-9-(2-phenylhydrazono)-2,3,4,9-tetrahydro-1H-cyclopenta[b]quinoline (6a).

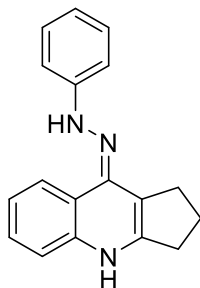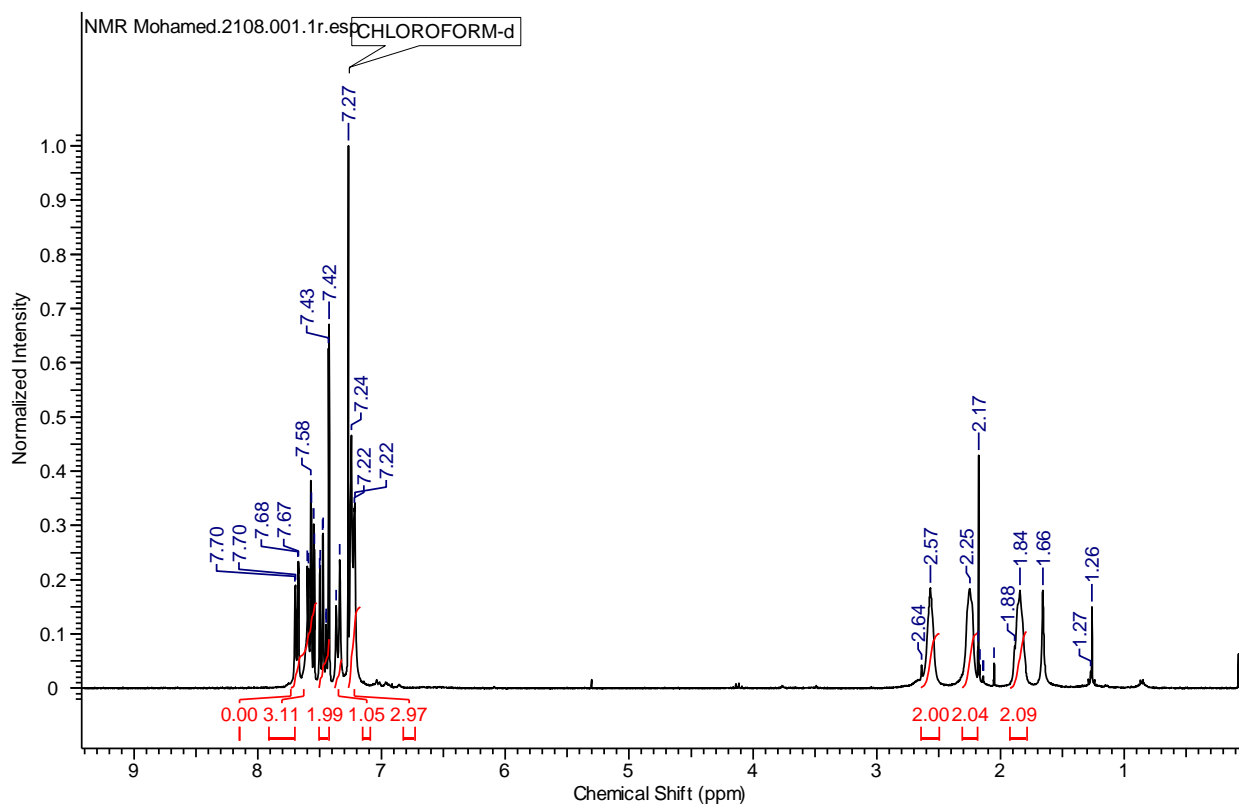

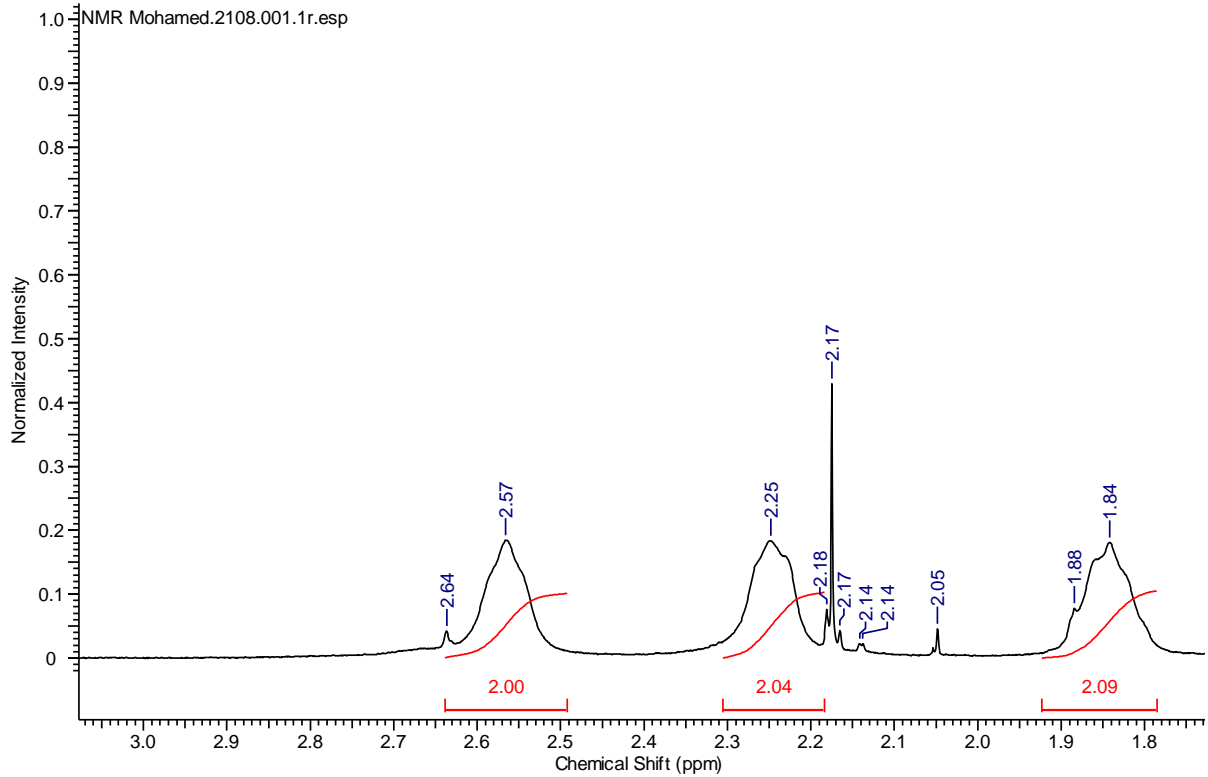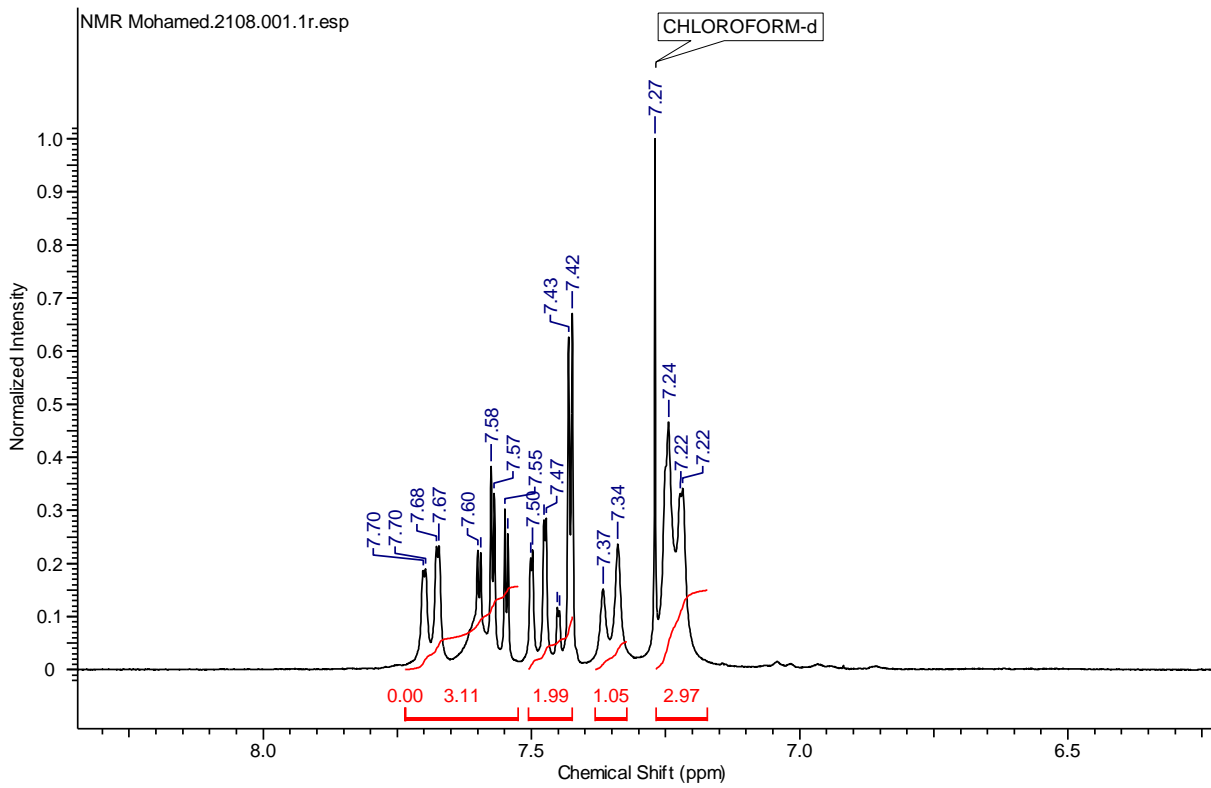

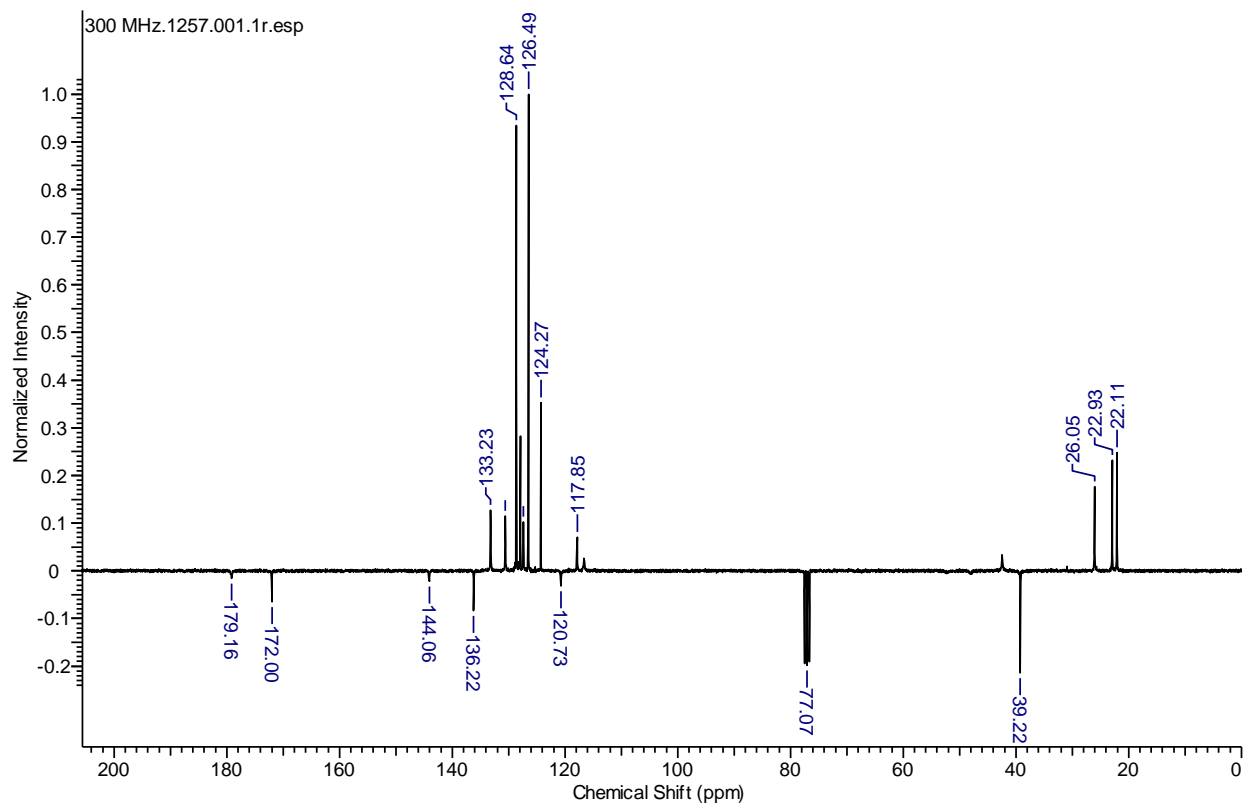

*(Z)*-*N'*-(1,2,3,4-tetrahydro-9*H*-cyclopenta[*b*]quinolin-9-ylidene)nicotinohydrazide (**6b**).

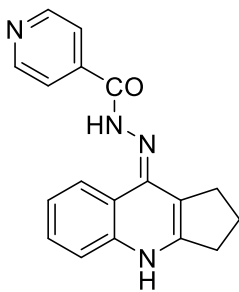

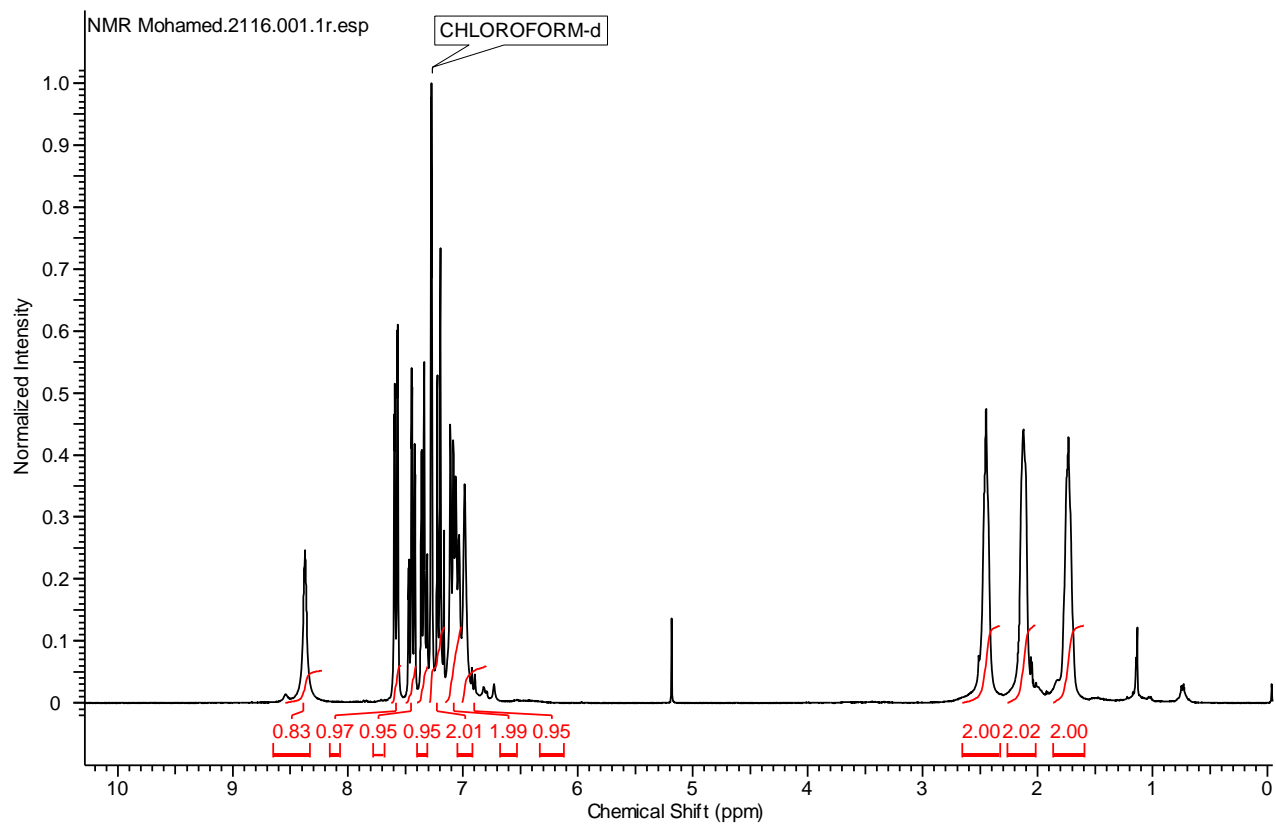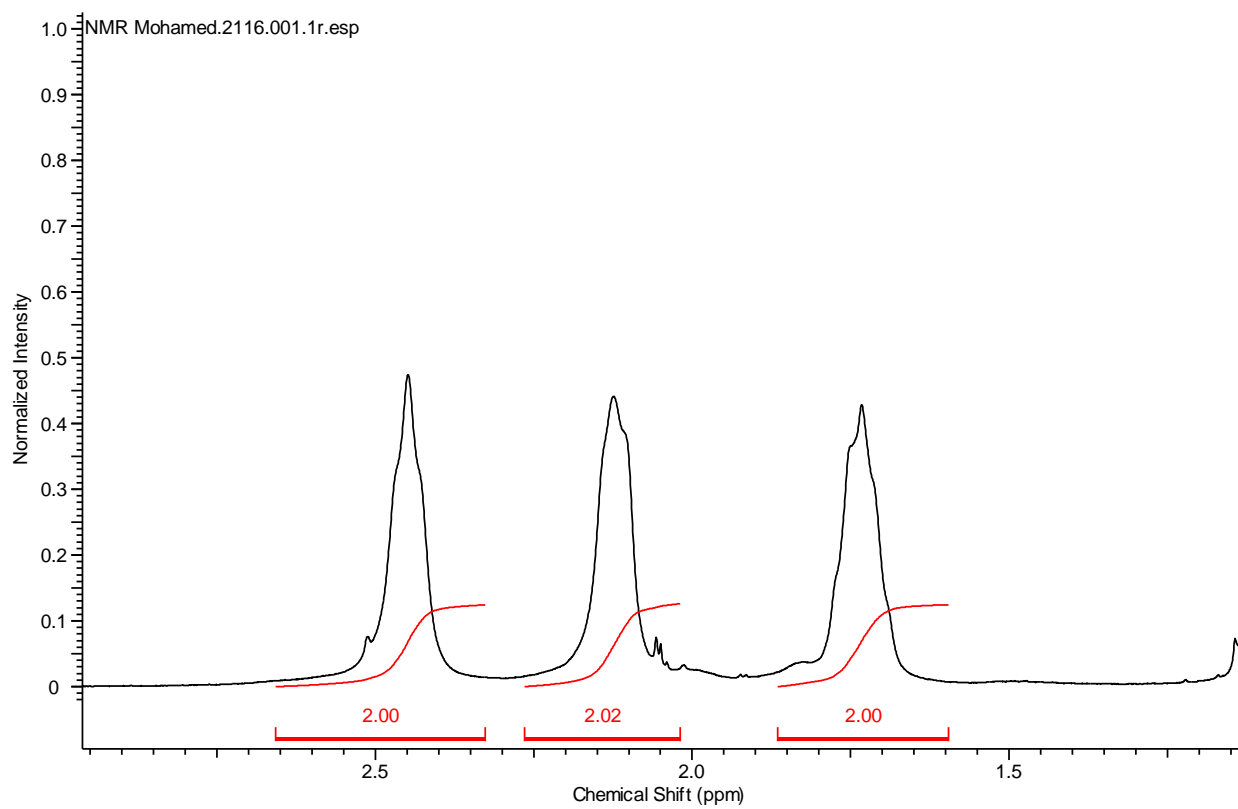

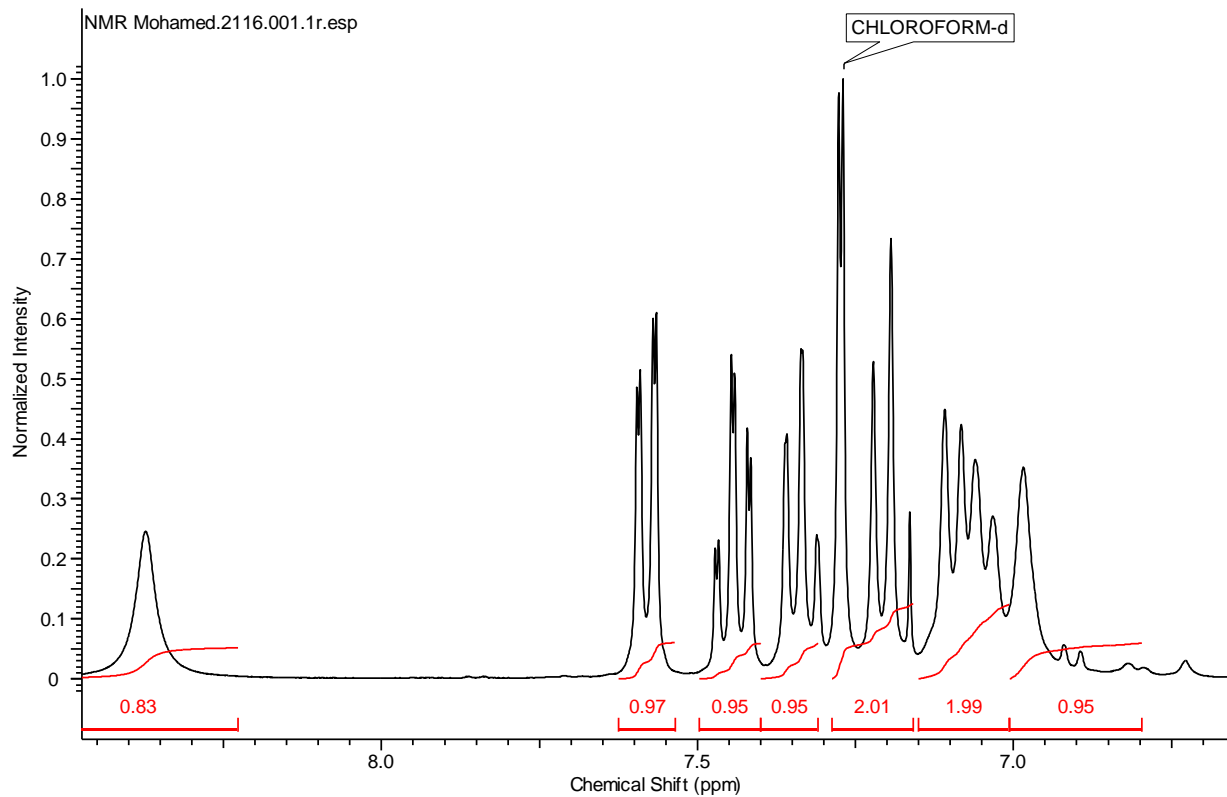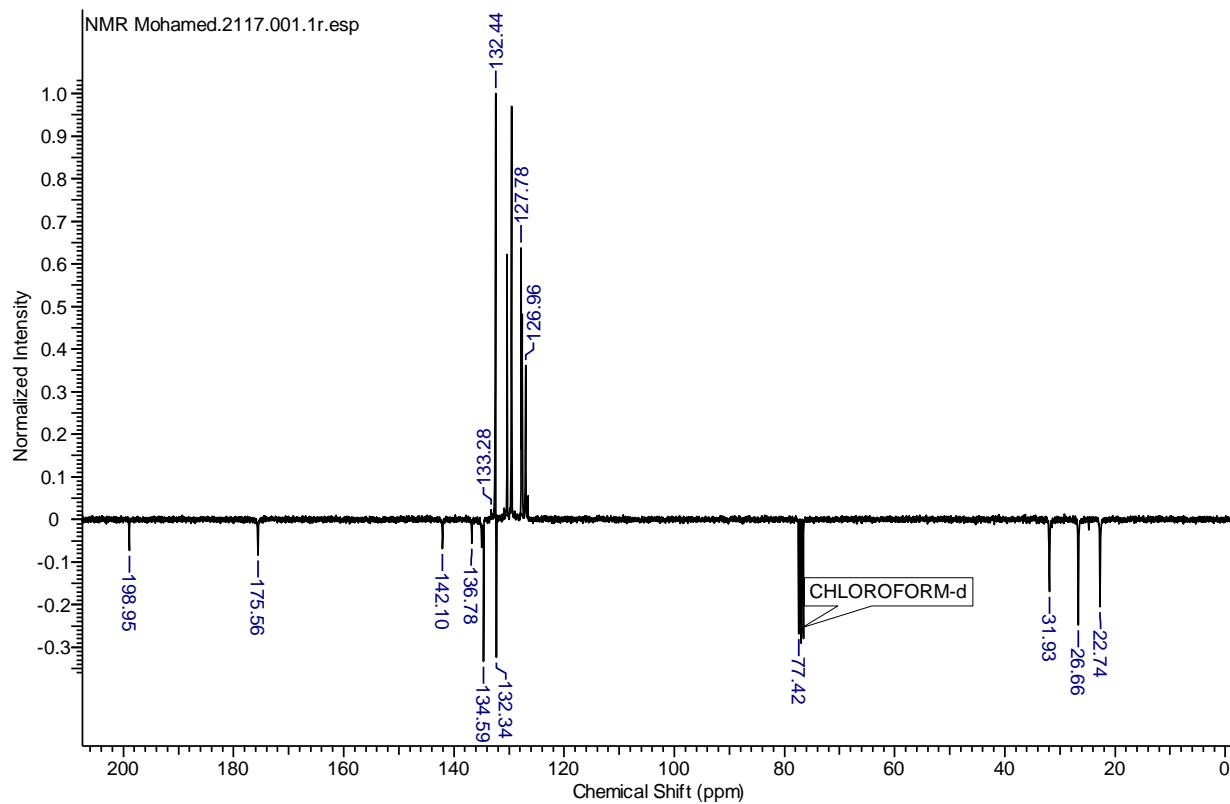

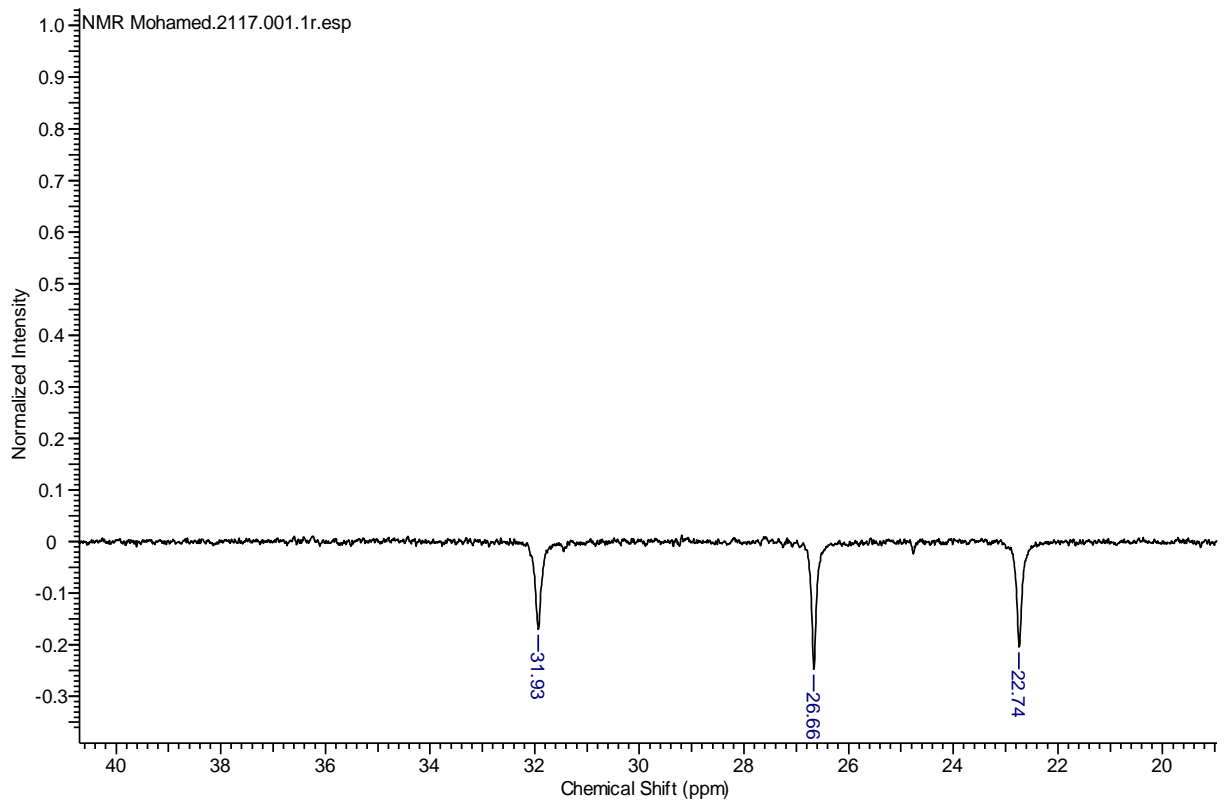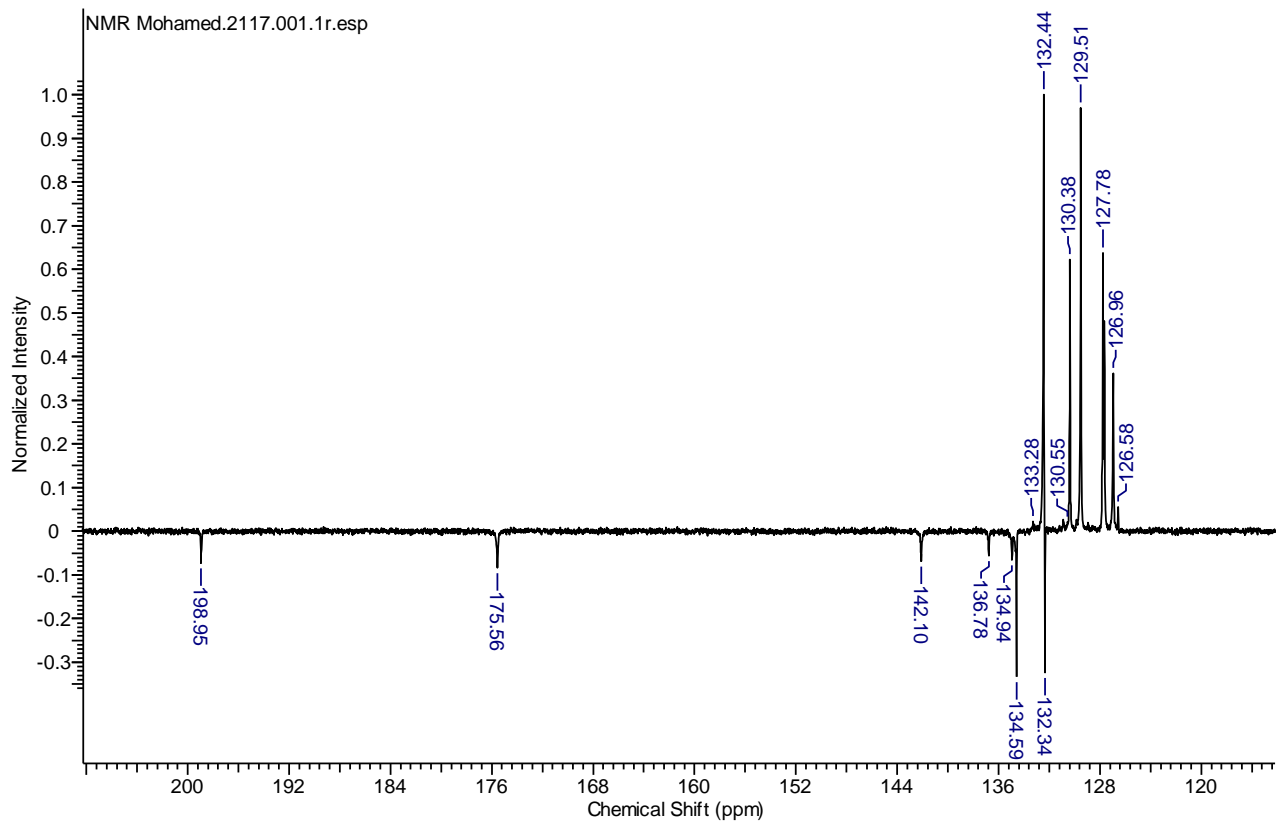

**(Z)-2-(1,2,3,4-tetrahydro-9H-cyclopenta[b]quinolin-9-ylidene)hydrazine-1-carbothioamide (6c).**

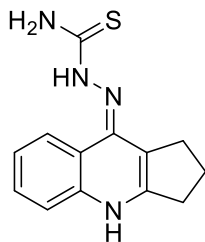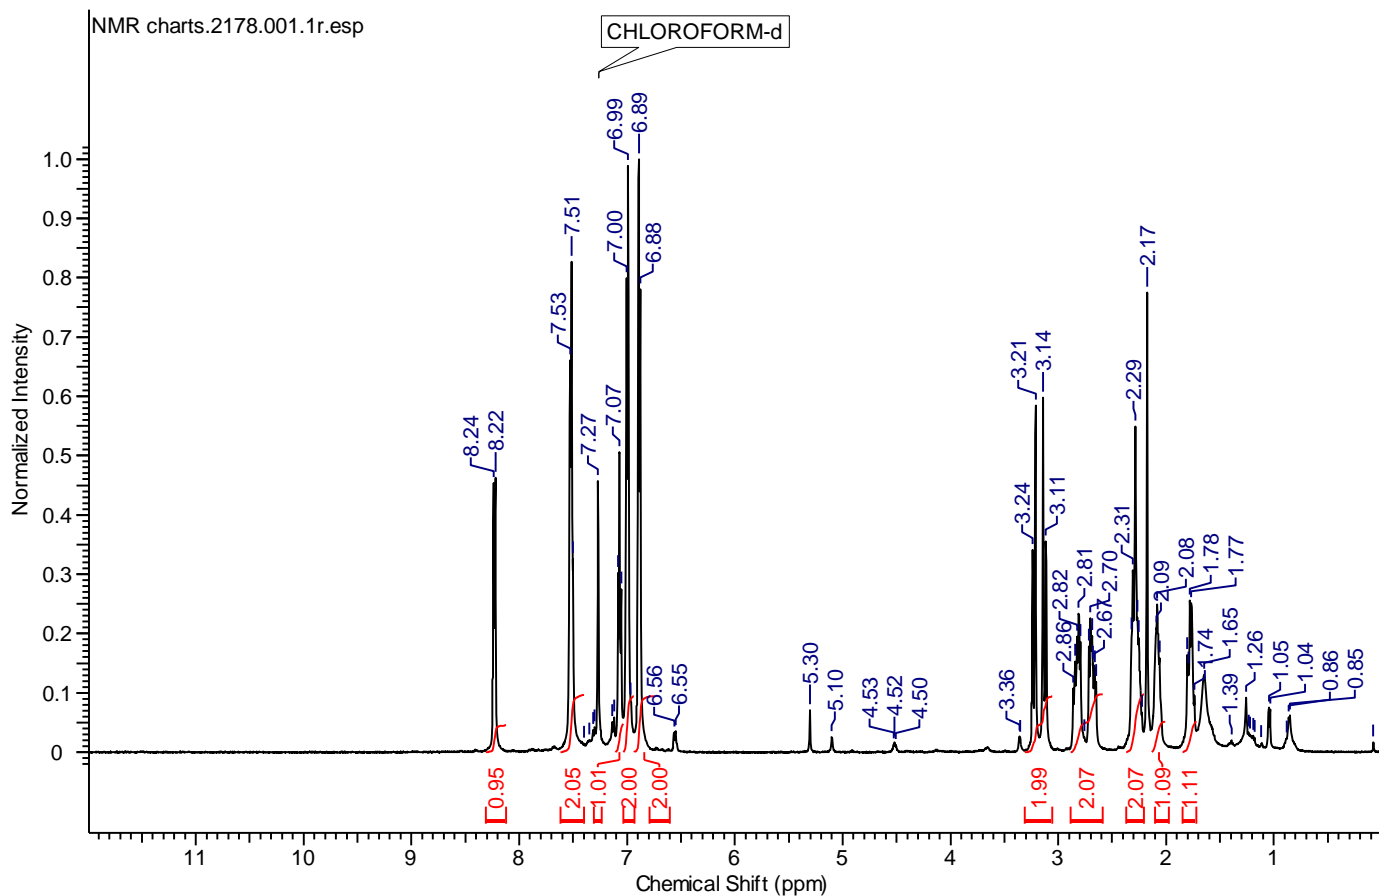



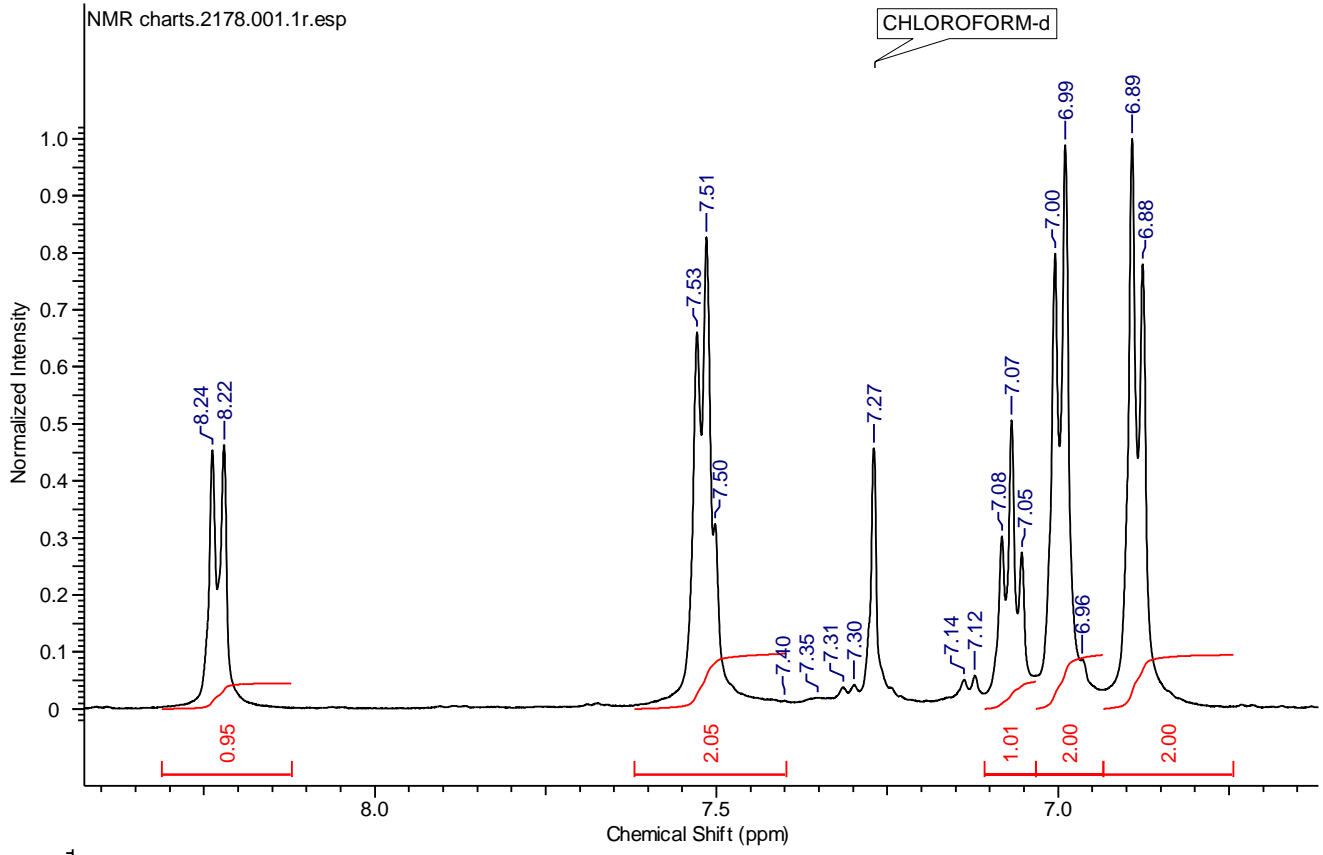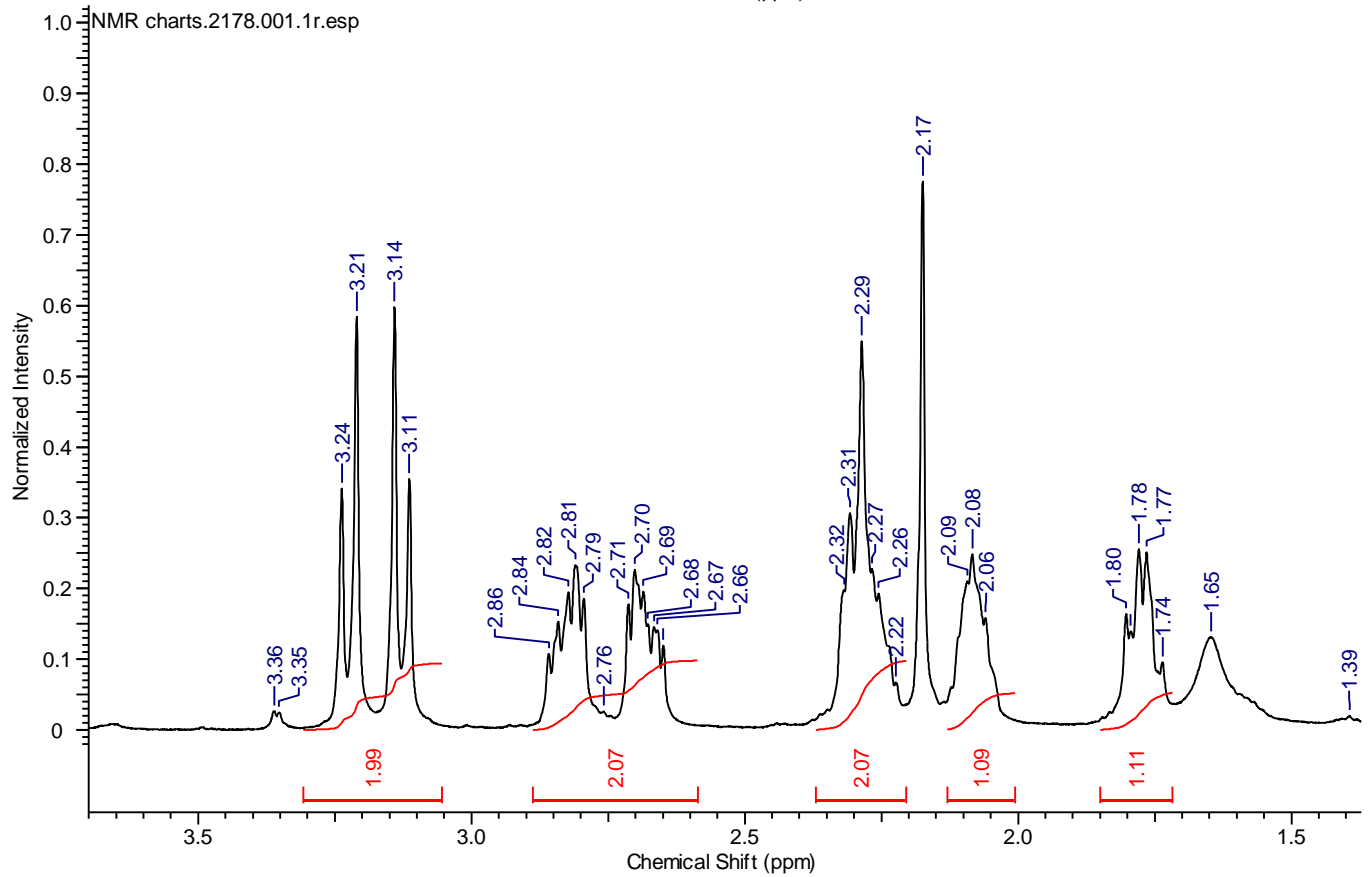

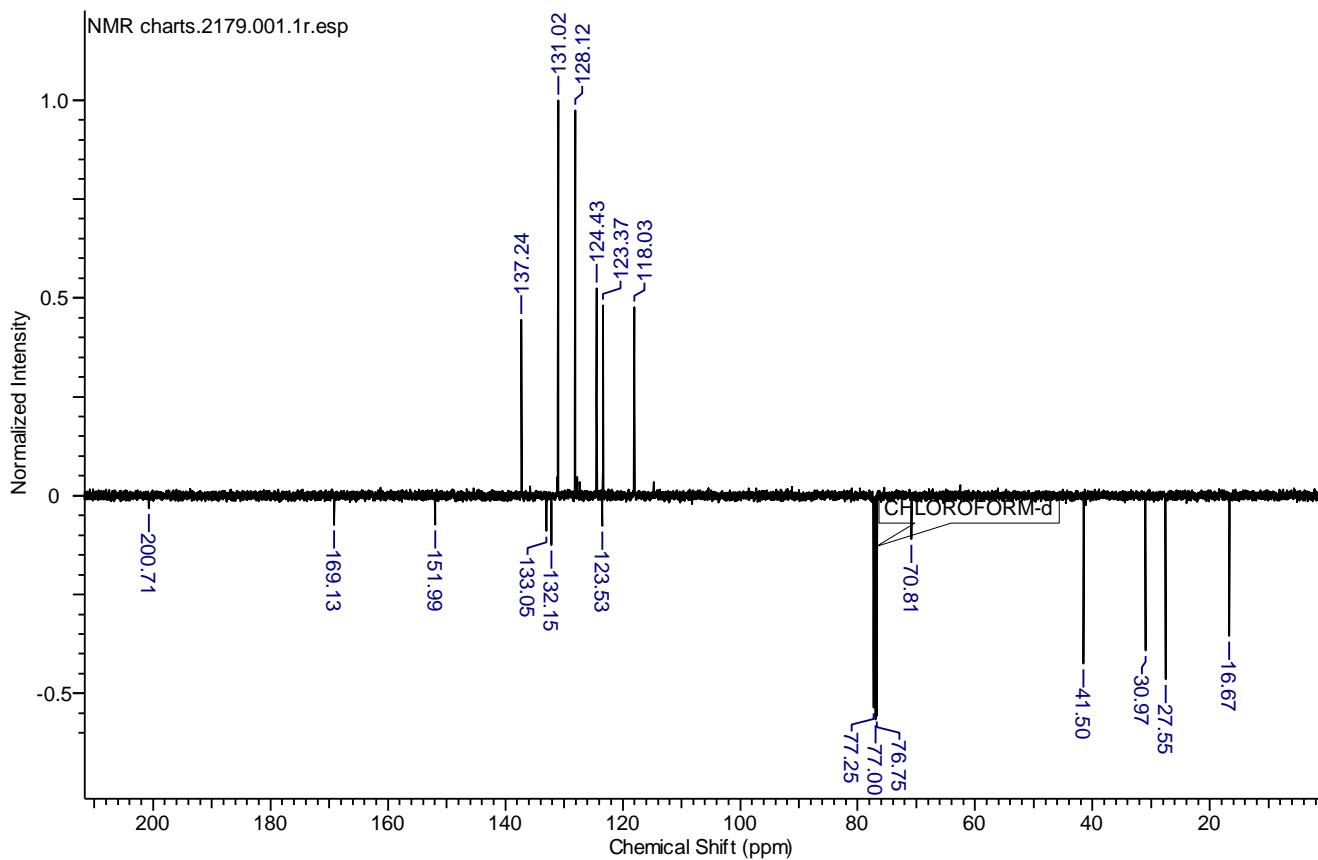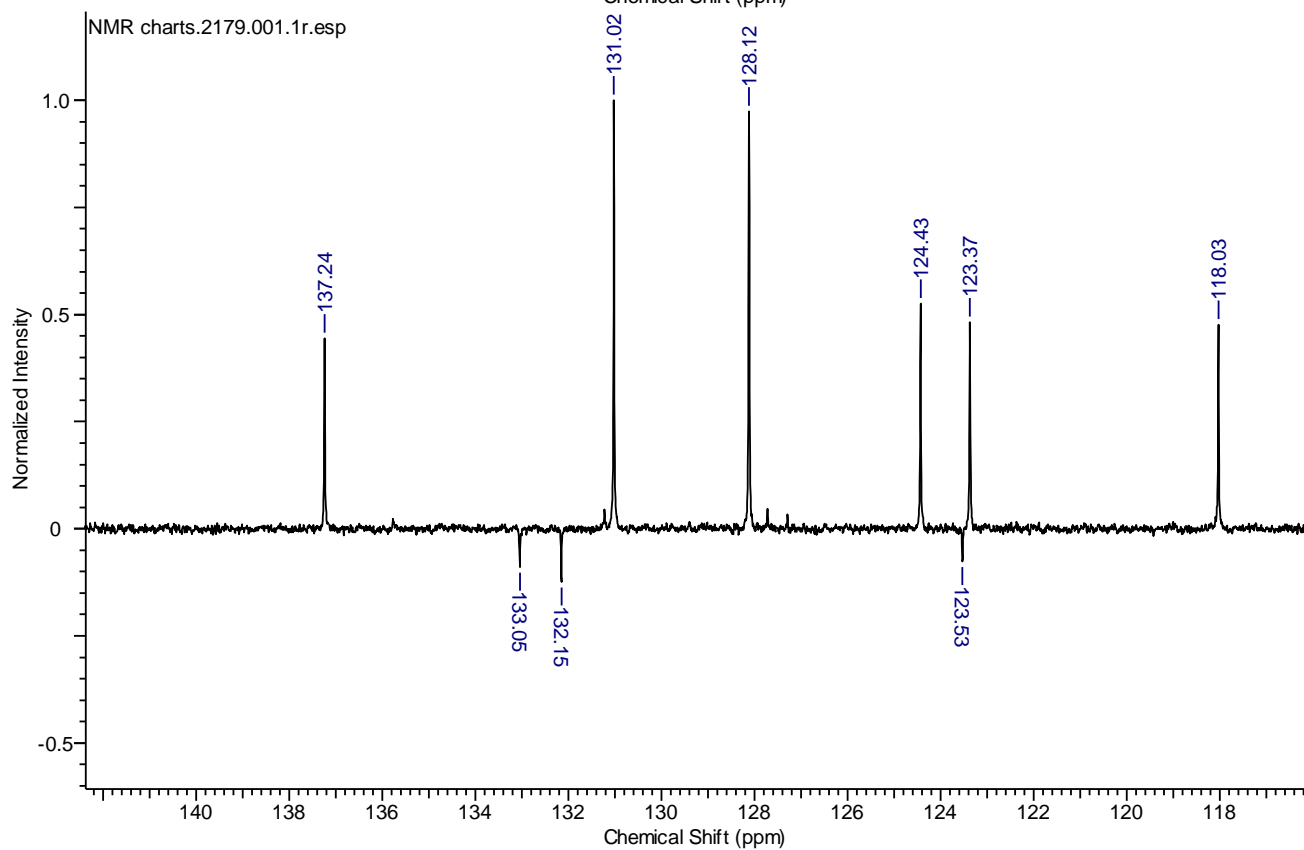

*(Z)*-2-(1,2,3,4-tetrahydro-9H-cyclopenta[b]quinolin-9-ylidene)hydrazine-1-carboxamide (**6d**).

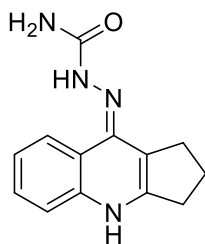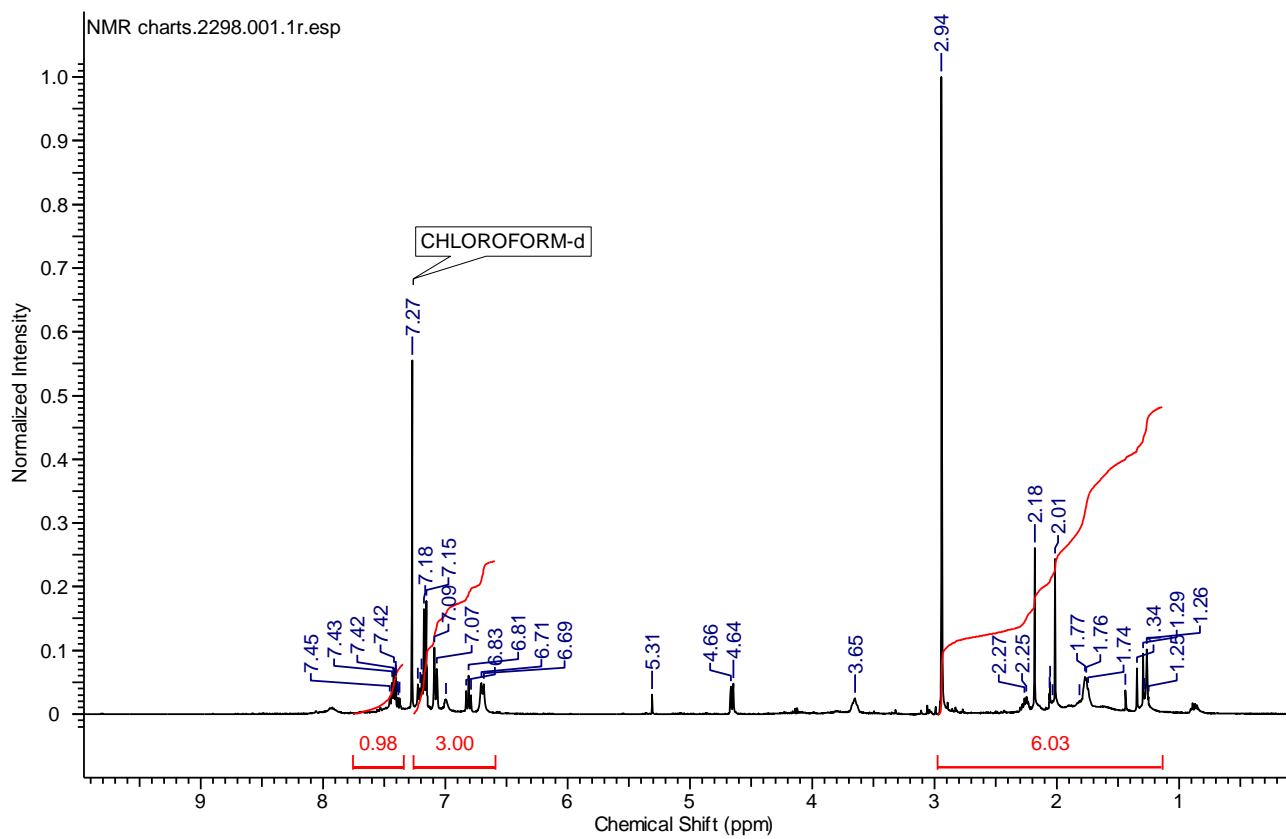

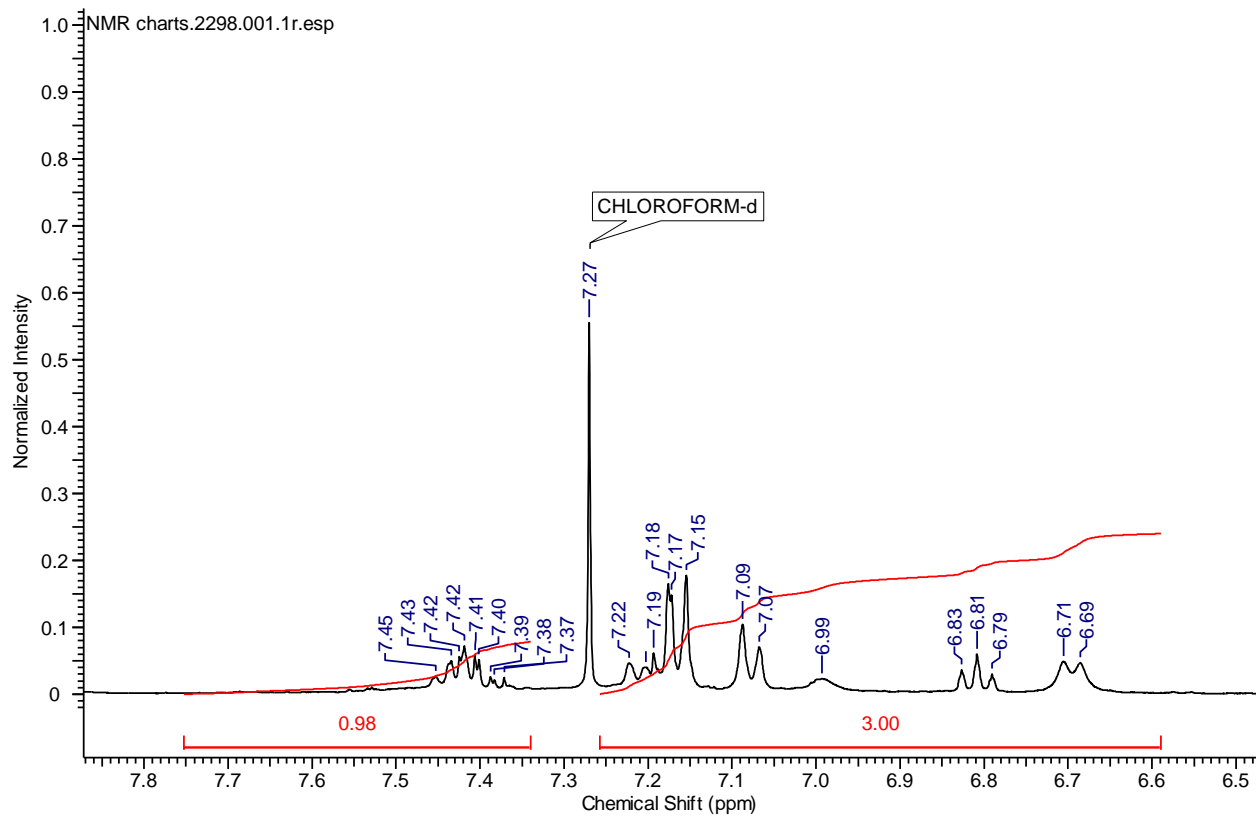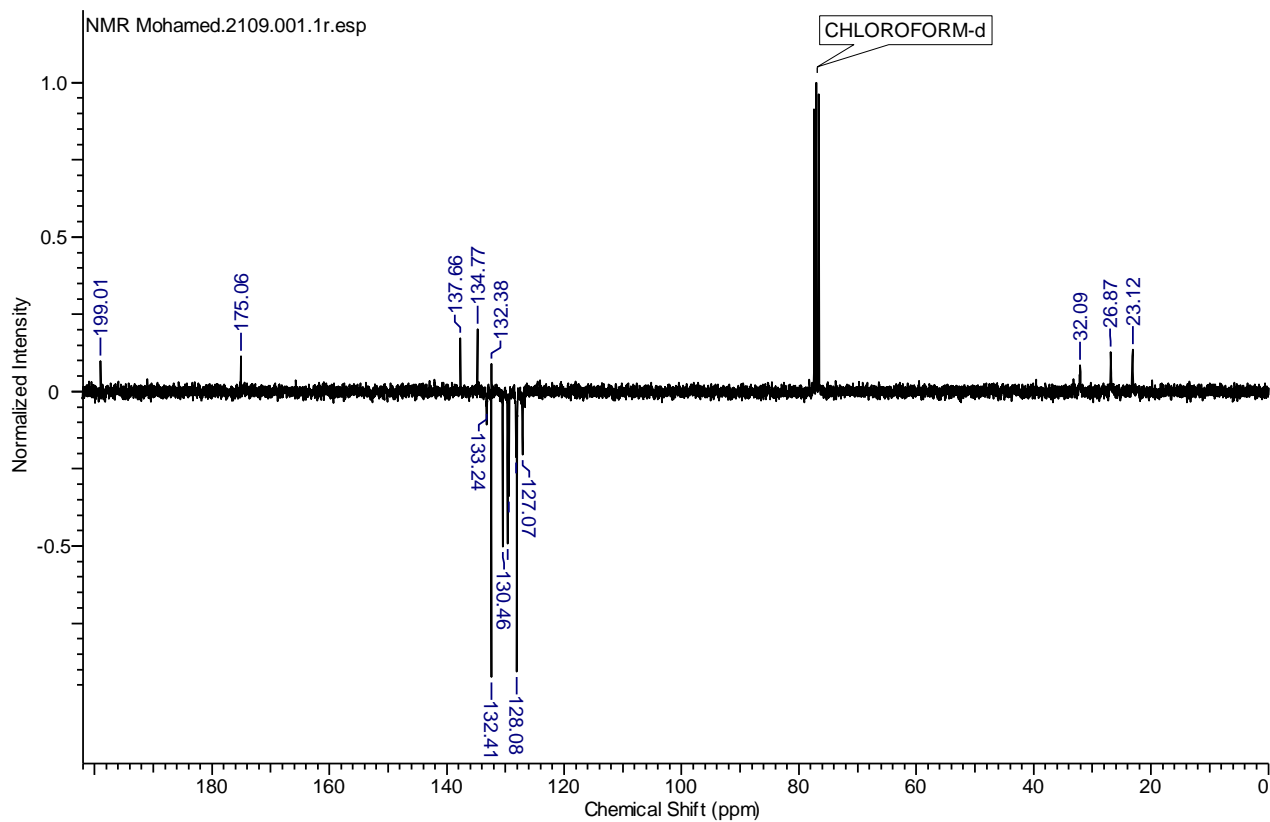

*(Z)*-*N'*-(1,2,3,4-tetrahydro-9*H*-cyclopenta[*b*]quinolin-9 ylidene)benzenesulfonylhydrazide (**6e**).

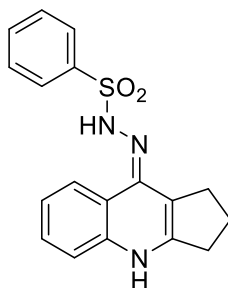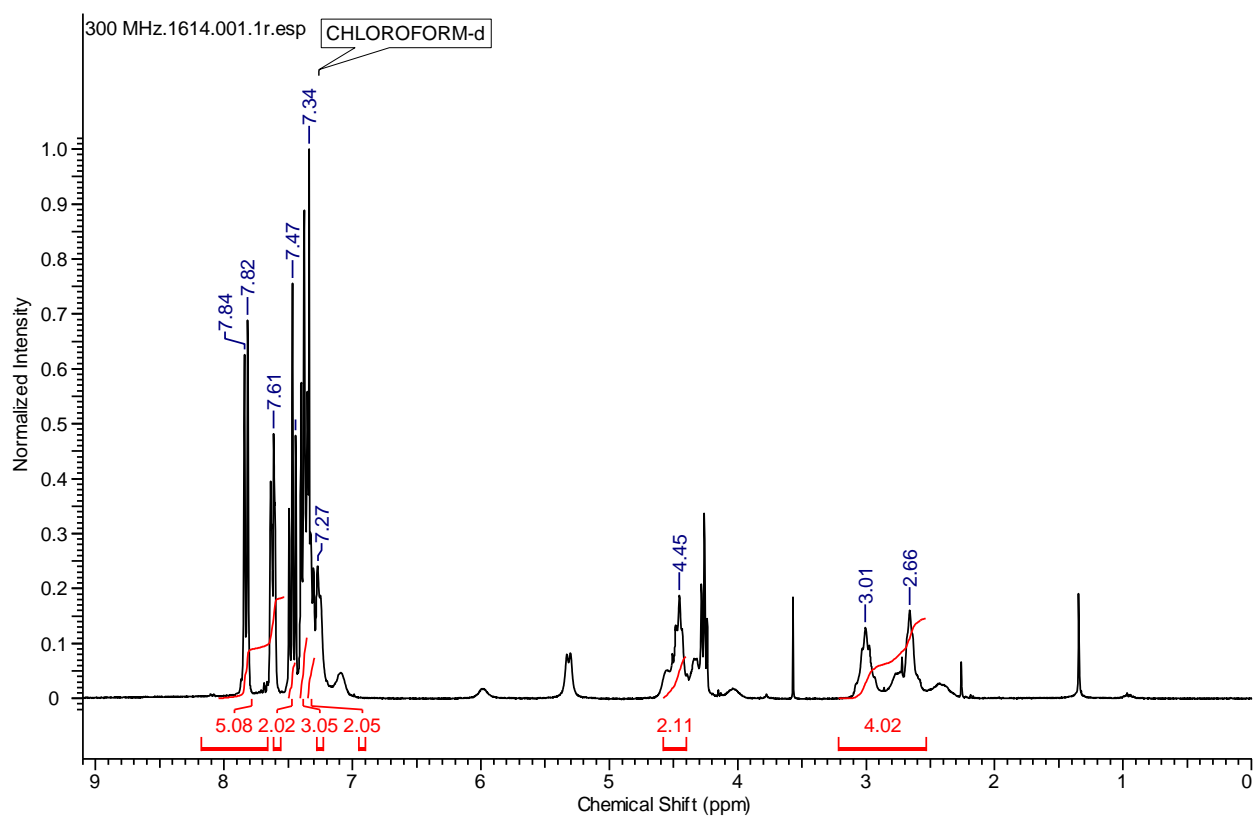

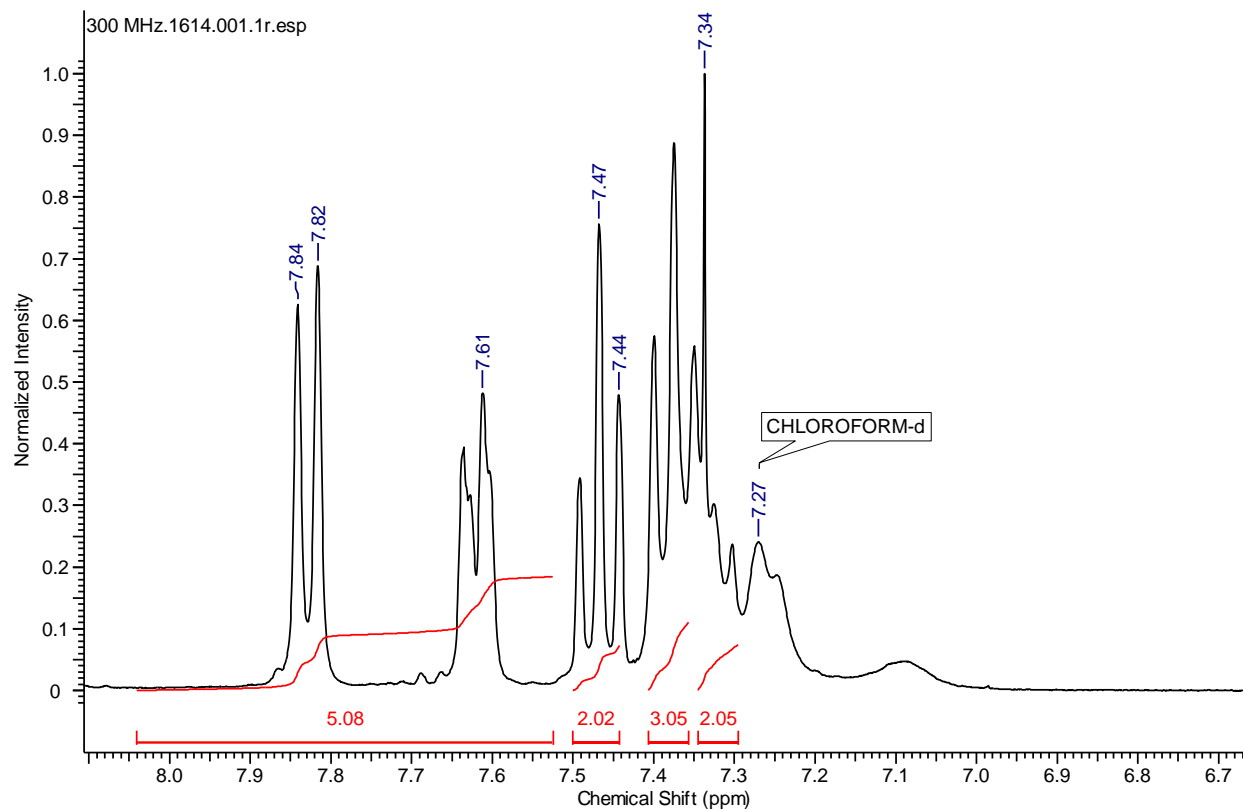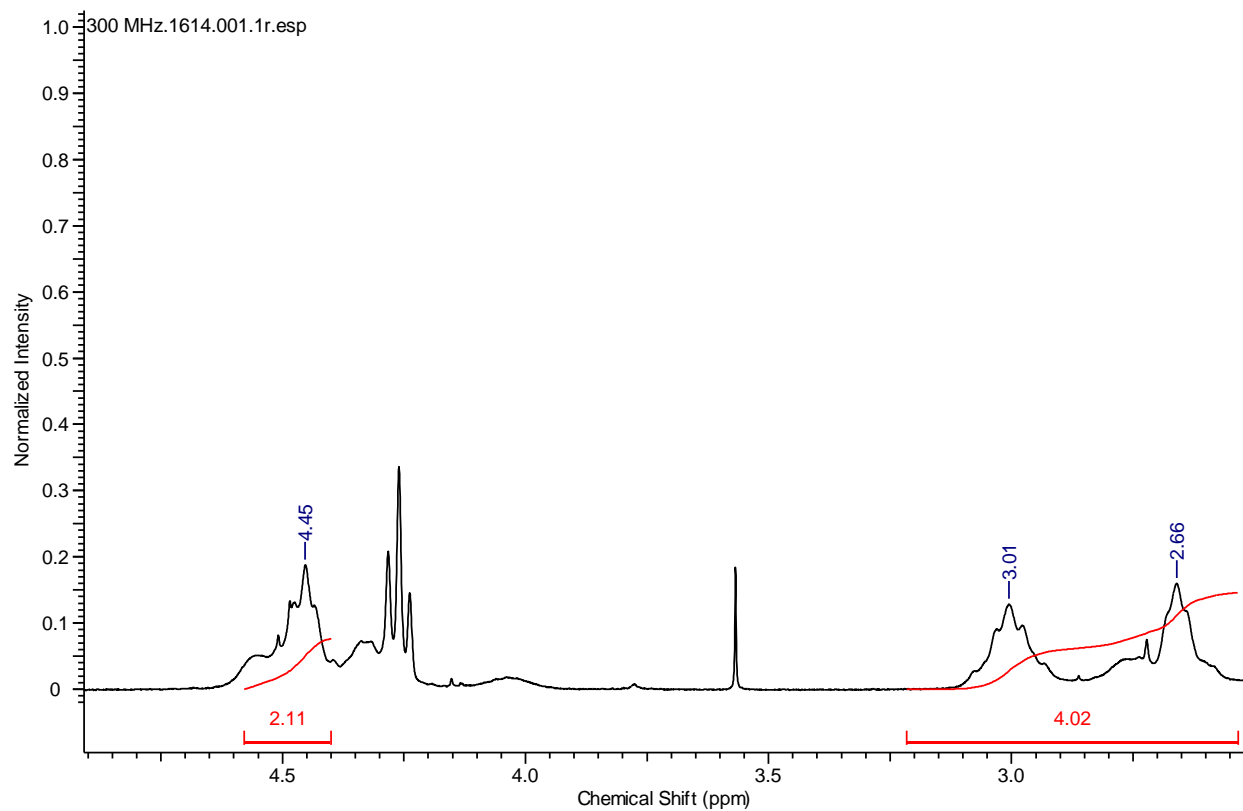

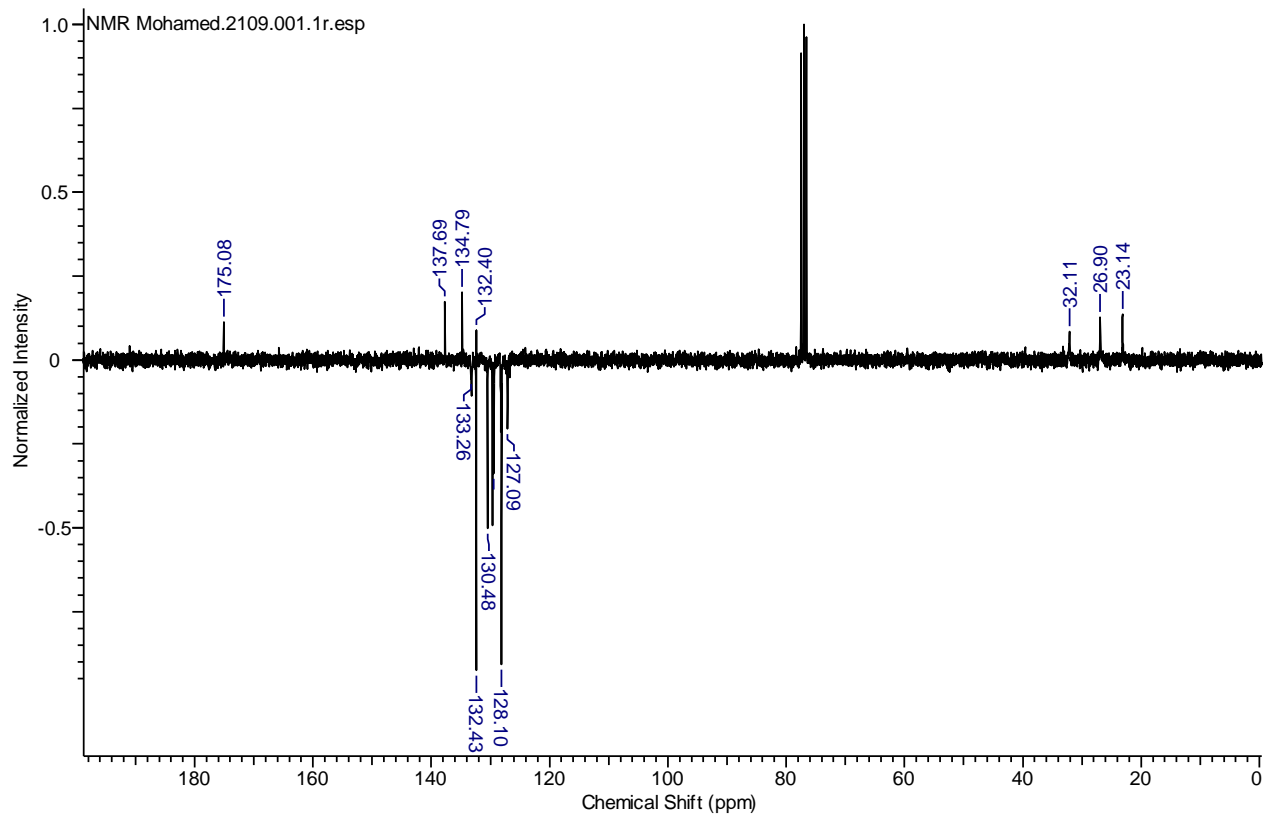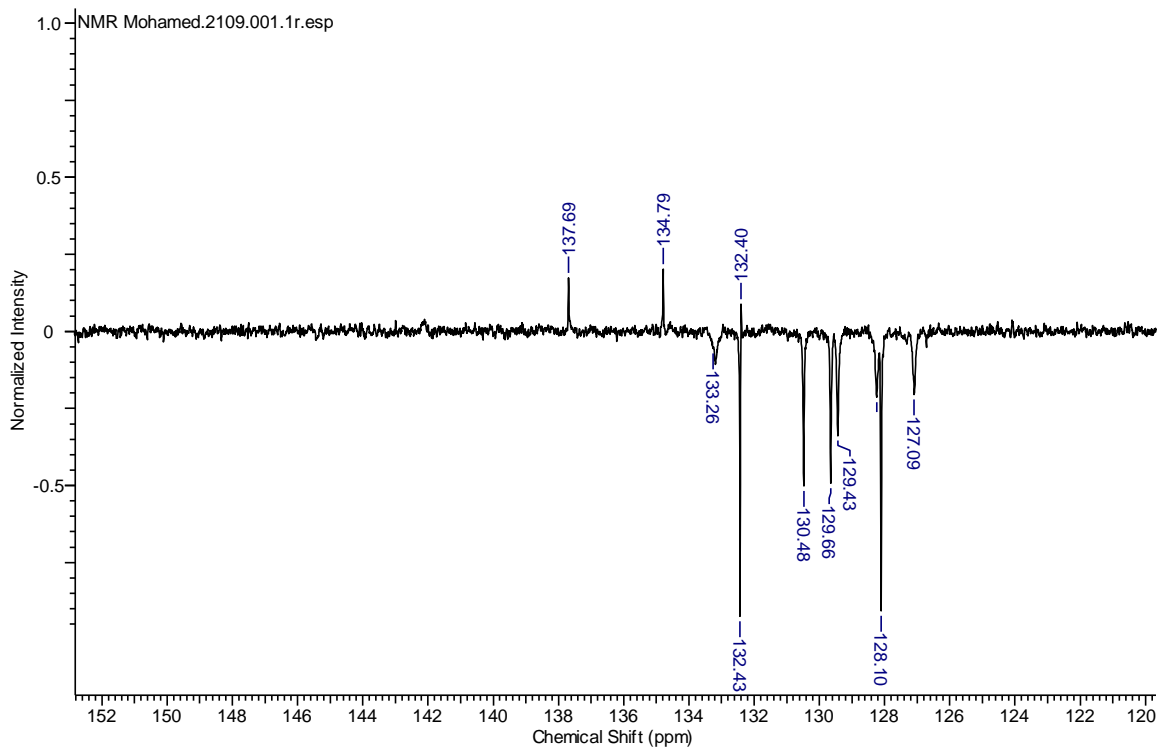

*(E)*-3-(((*Z*)-1,2,3,4-tetrahydro-9*H*-cyclopenta[*b*]quinolin-9-ylidene)hydrazono)indolin-2-one (6*f*).

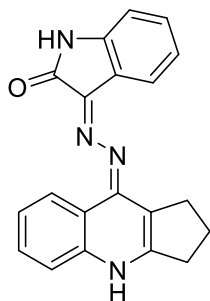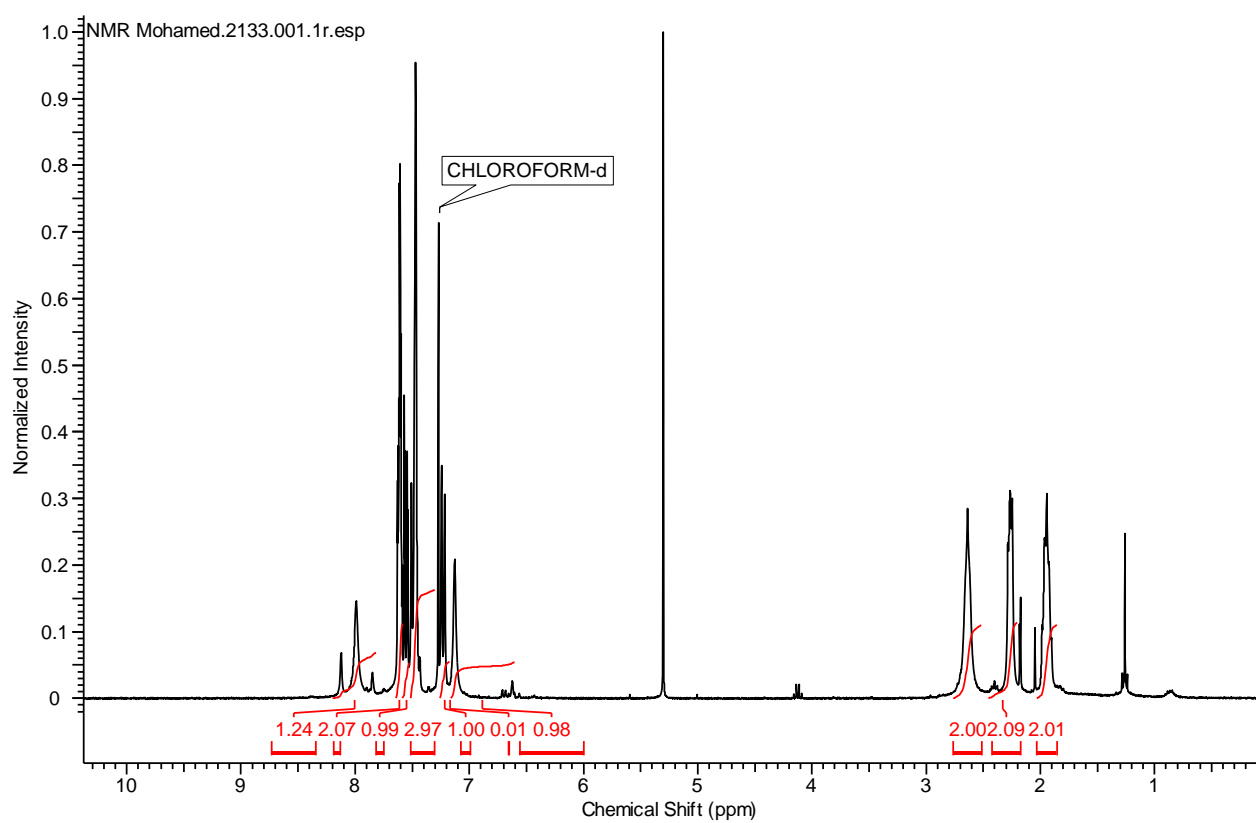



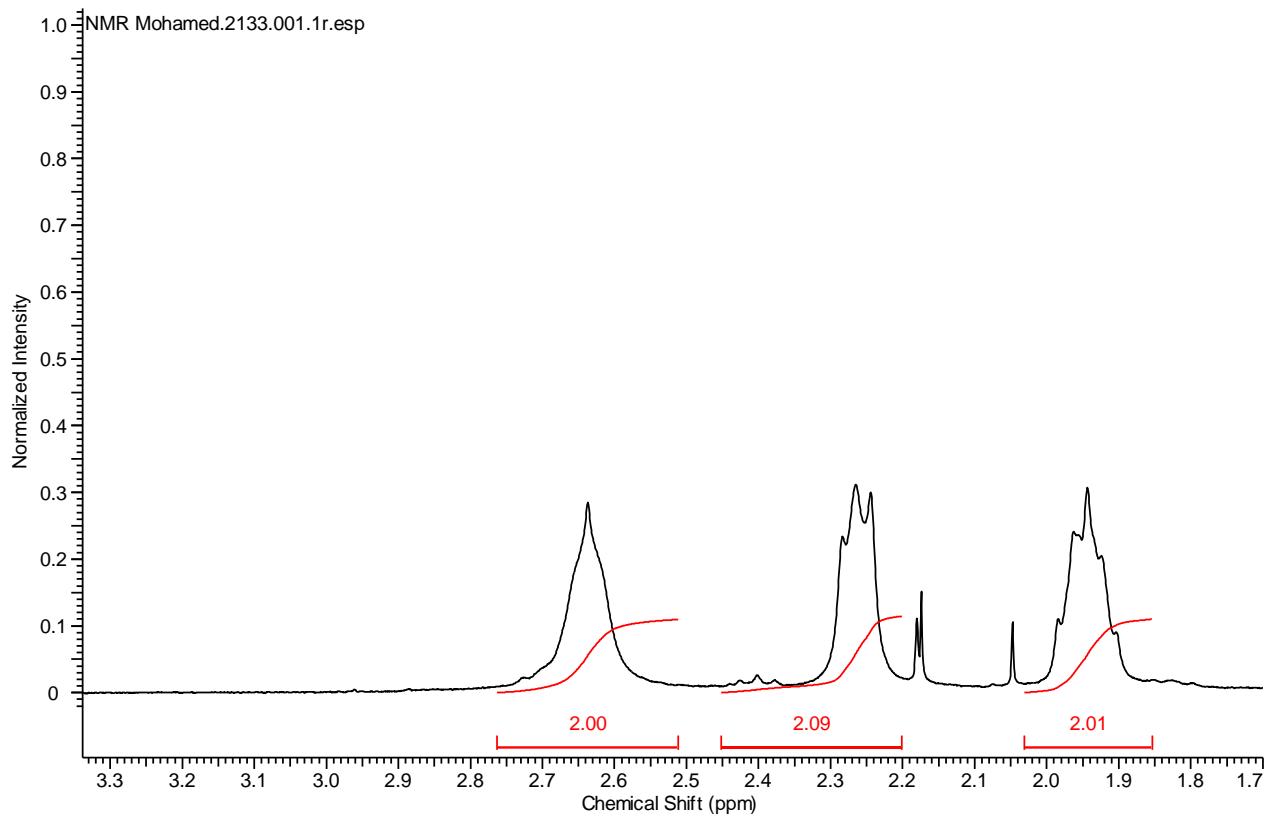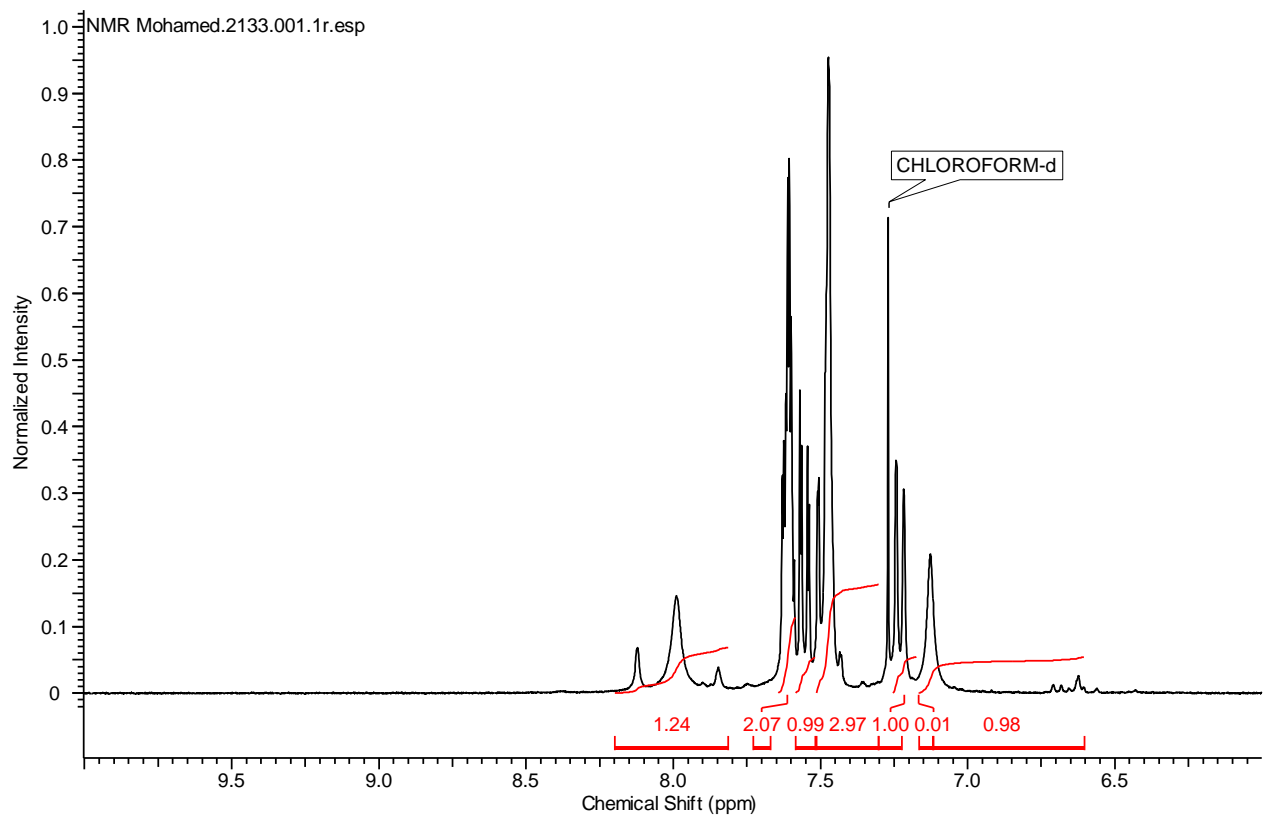

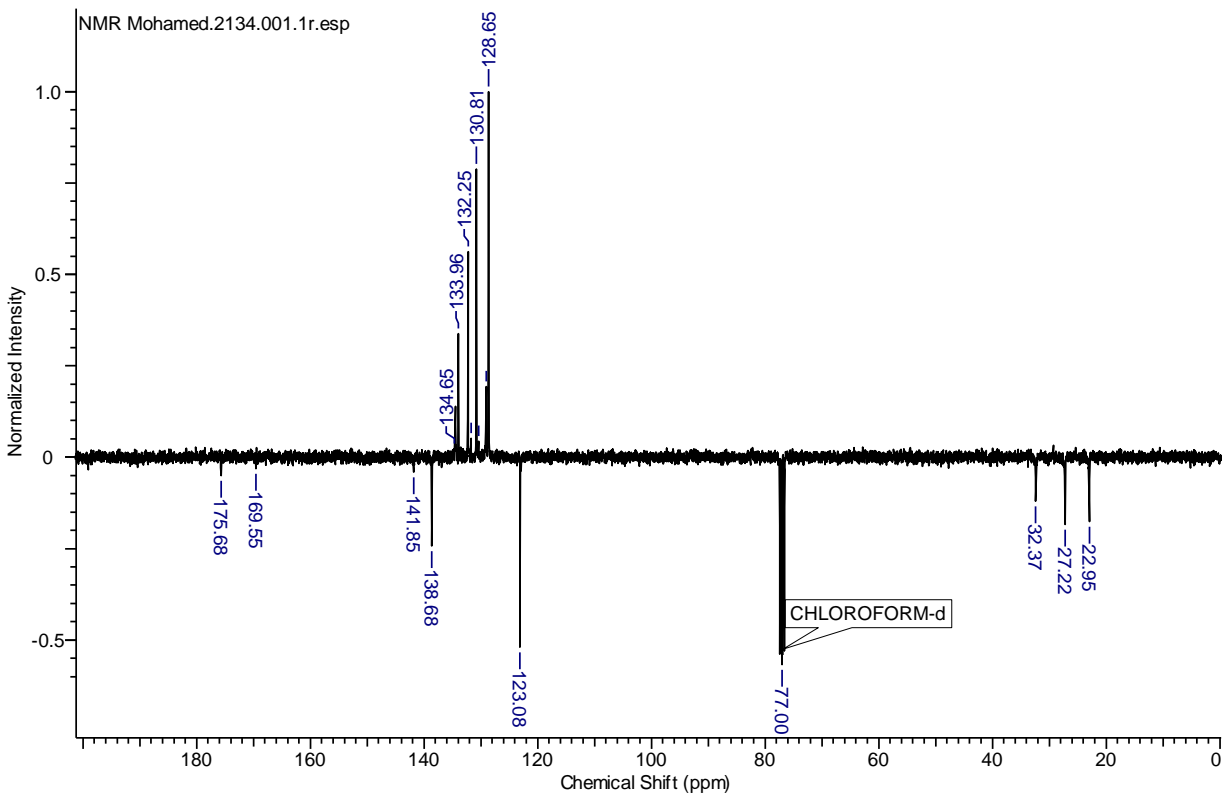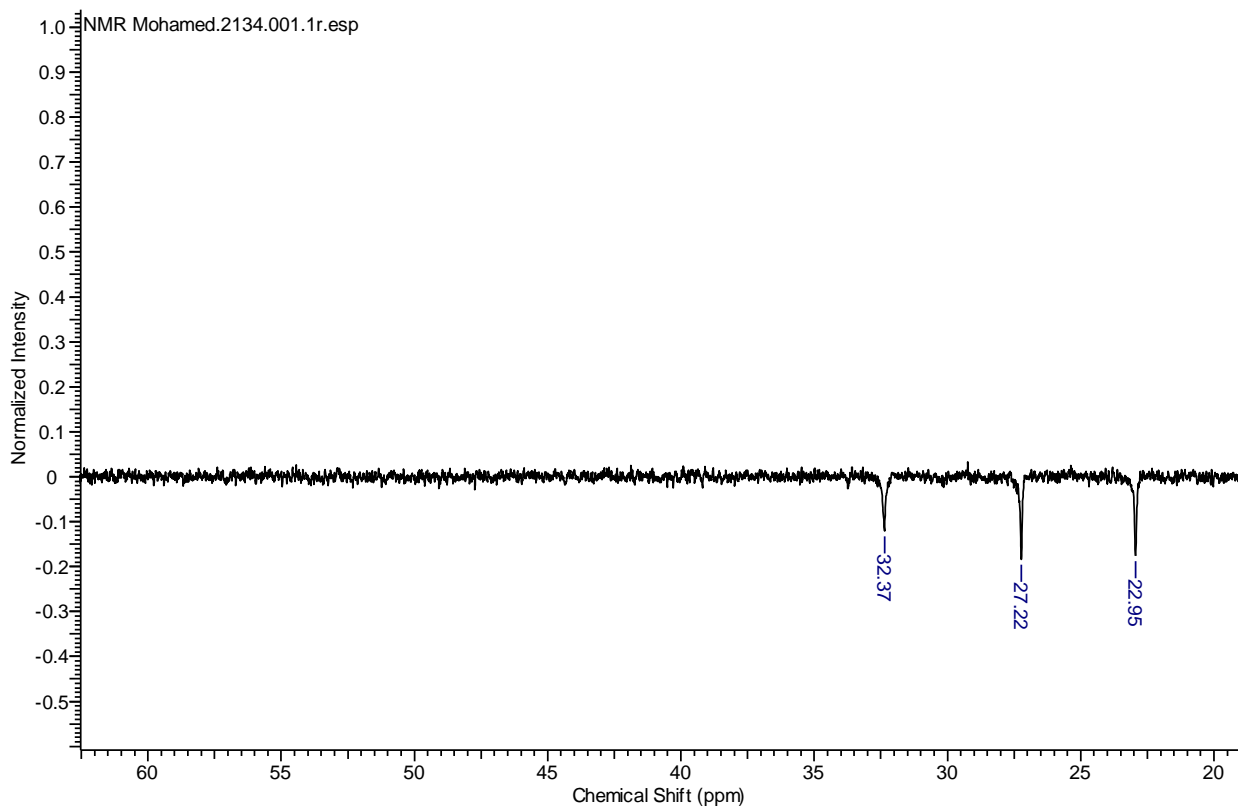

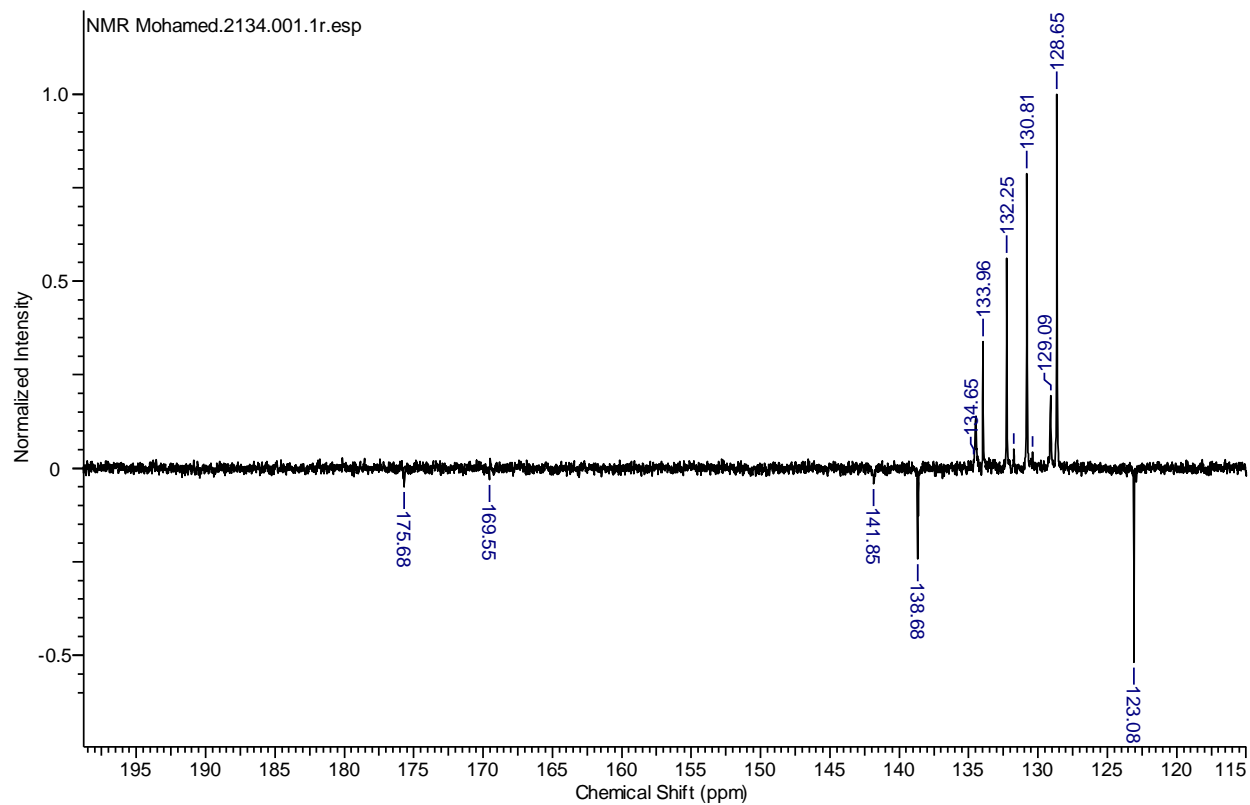

*(Z)*-9-(2-(naphthalen-1-yl)hydrazono)-2,3,4,9-tetrahydro-1H-cyclopenta[b]quinoline (6g).

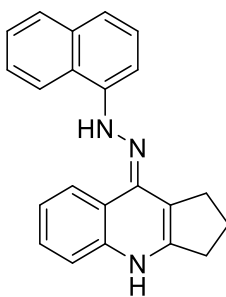

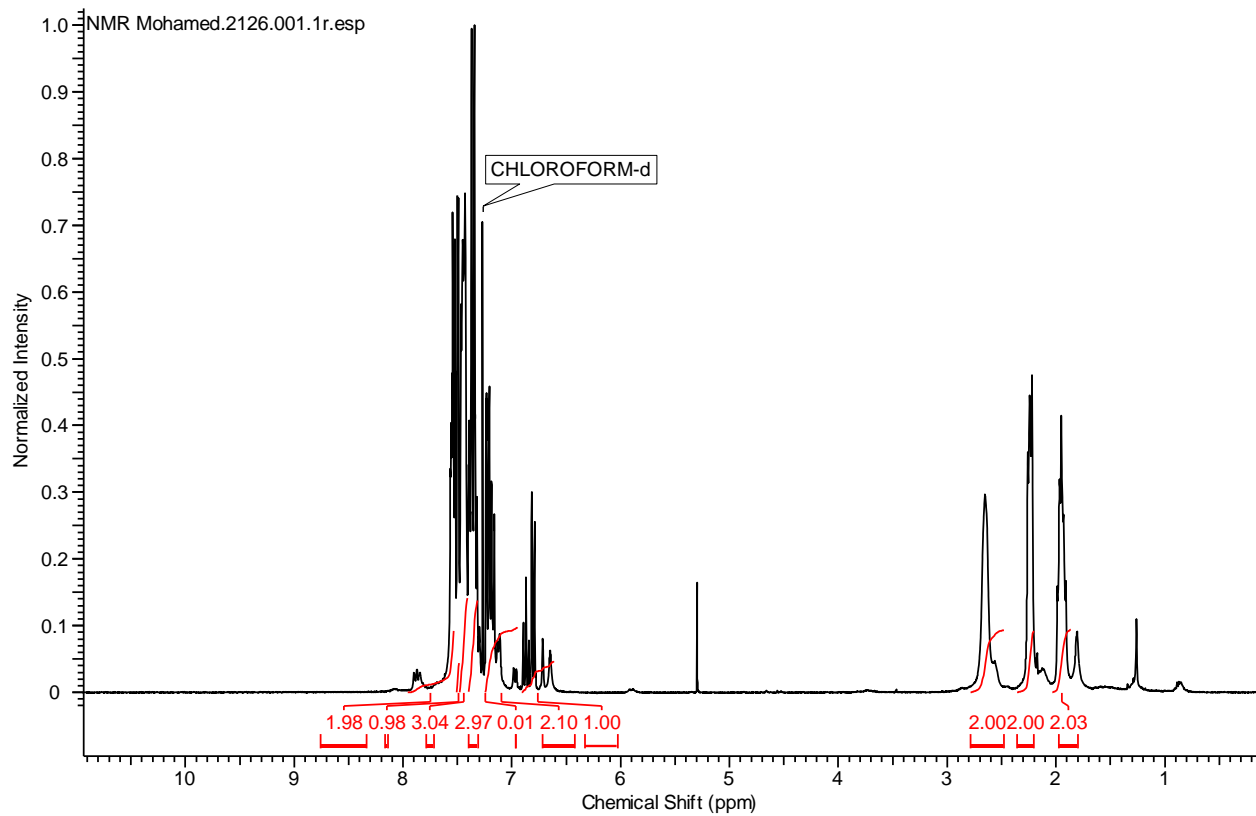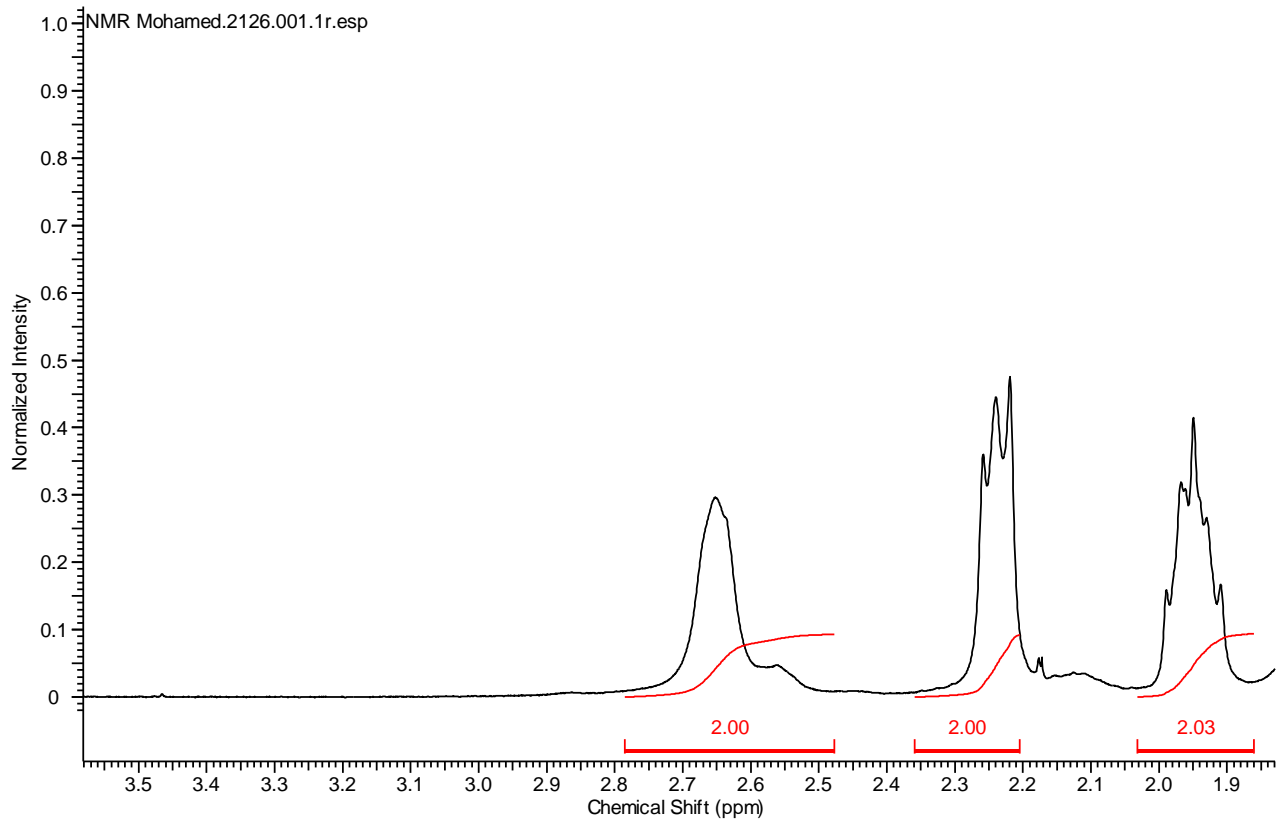

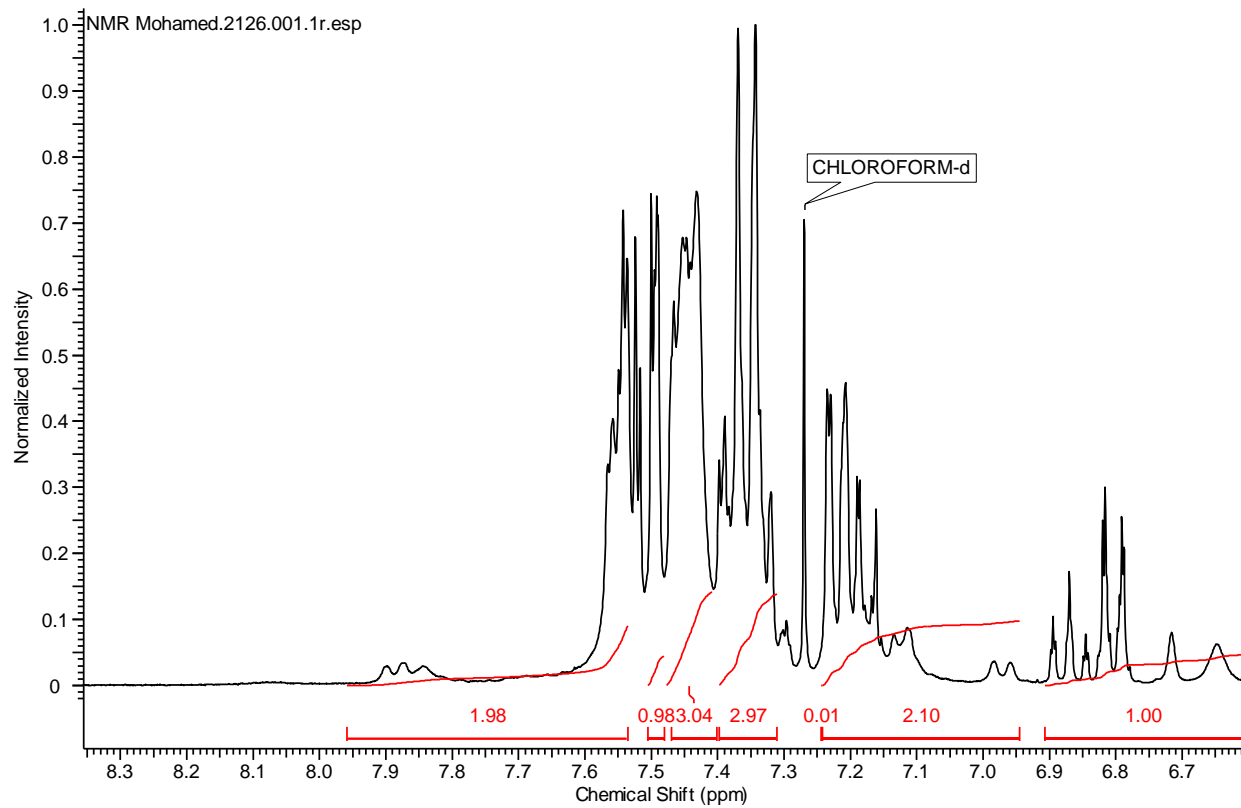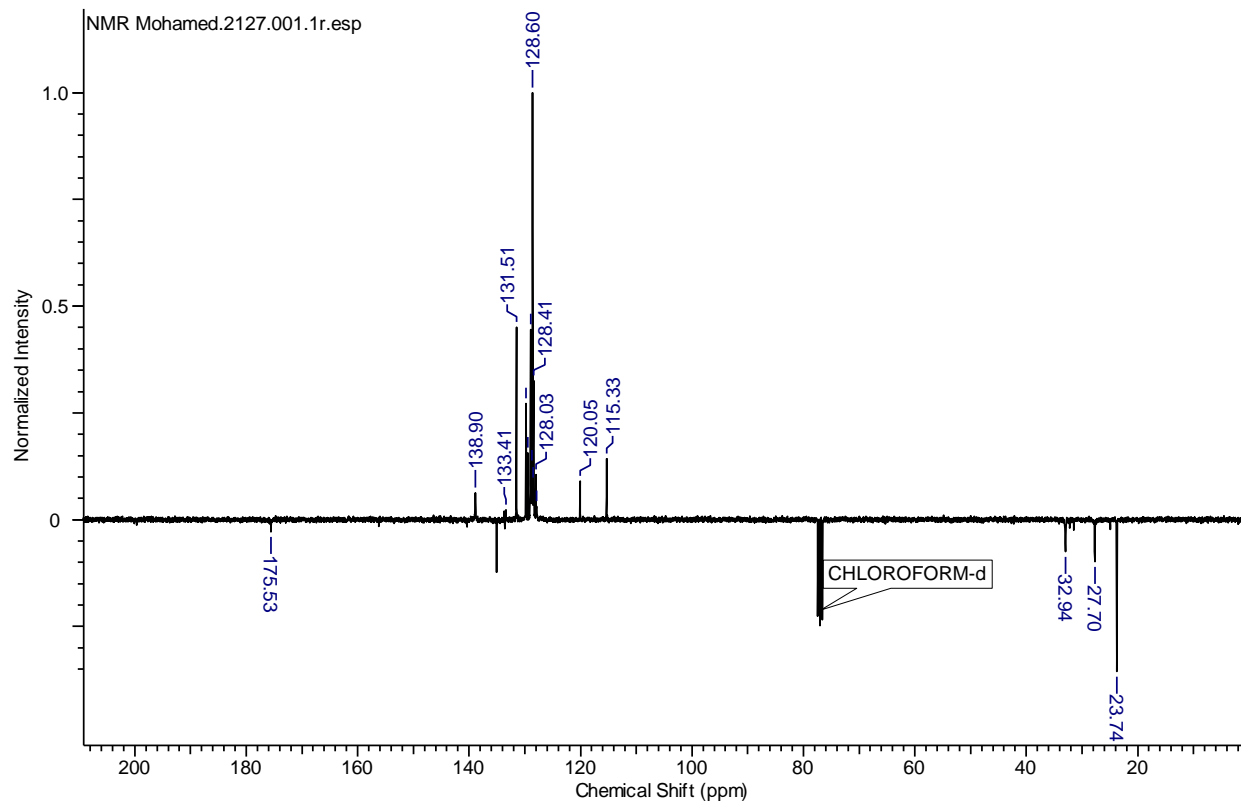

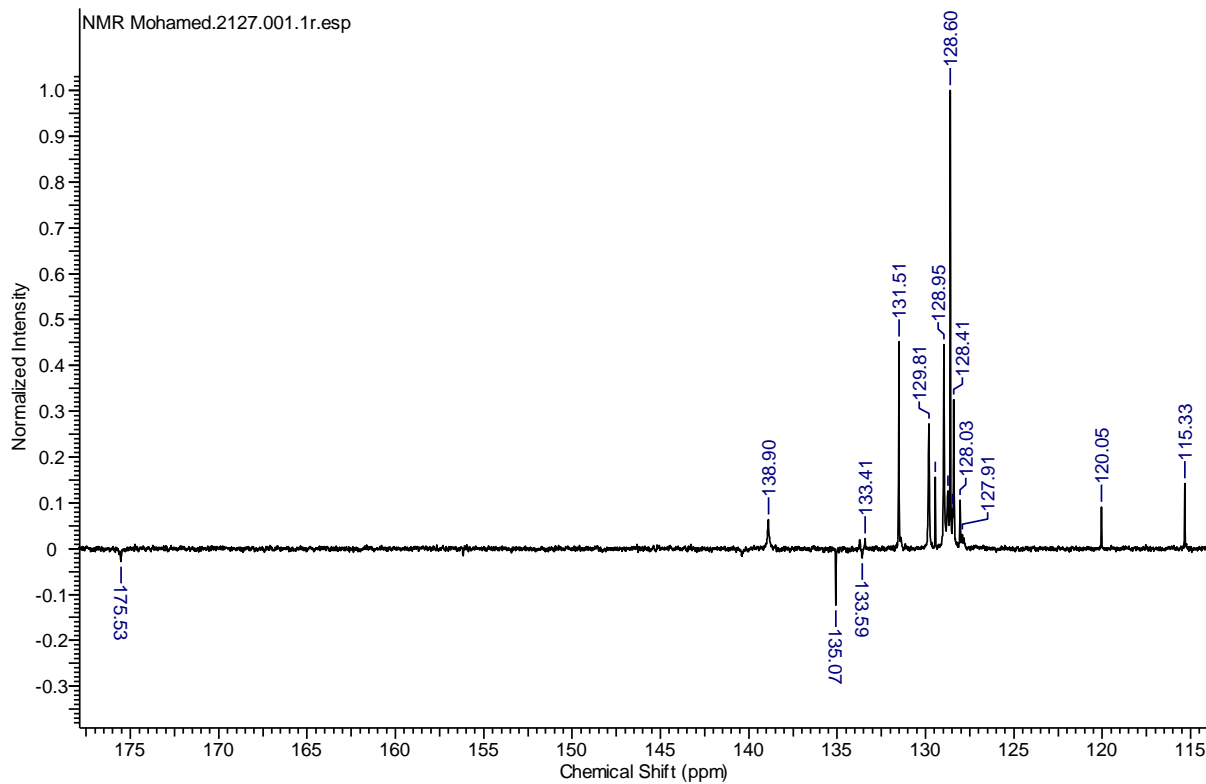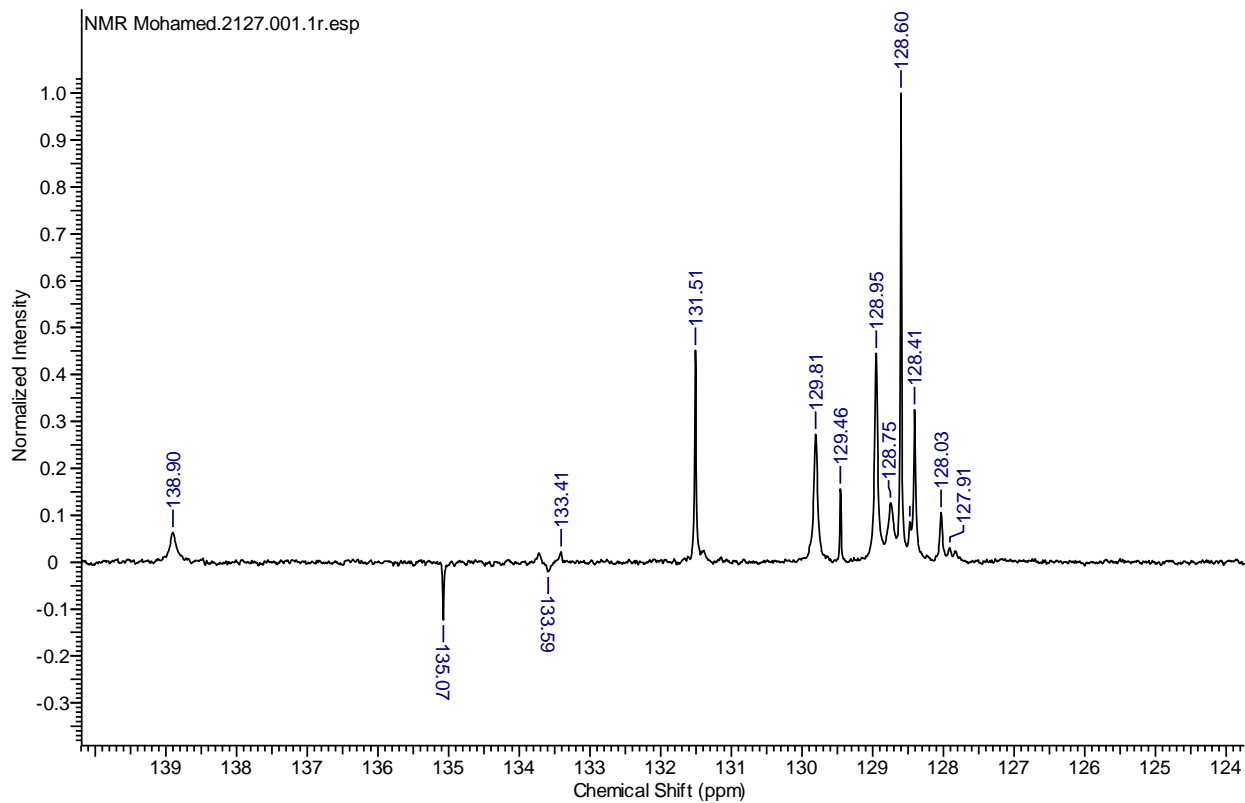

Supplement: d2nj01646j1.pdf [file d2nj01646j1.pdf]
